1 **The genome of the plague-resistant great gerbil reveals species-specific**  
2 **duplication of an MHCII gene**

3 Pernille Nilsson<sup>1\*</sup>, Monica H. Solbakken<sup>1</sup>, Boris V. Schmid<sup>1</sup>, Russell J. S. Orr<sup>2</sup>, Ruichen Lv<sup>3</sup>,  
4 Yujun Cui<sup>3</sup>, Yajun Song<sup>3</sup>, Yujiang Zhang<sup>4</sup>, Nils Chr. Stenseth<sup>1,5</sup>, Ruifu Yang<sup>3</sup>, Kjetill S. Jakobsen<sup>1</sup>,  
5 W. Ryan Easterday<sup>1</sup> & Sissel Jentoft<sup>1</sup>

6

7 <sup>1</sup> Centre for Ecological and Evolutionary Synthesis, Department of Biosciences, University of Oslo

8 <sup>2</sup> Natural History Museum, University of Oslo, Oslo, Norway

9 <sup>3</sup> State Key Laboratory of Pathogen and Biosecurity, Beijing Institute of Microbiology and  
10 Epidemiology, Beijing 100071, China

11 <sup>4</sup> Xinjiang Center for Disease Control and Prevention, Urumqi, China

12 <sup>5</sup> Ministry of Education Key Laboratory for Earth System Modeling, Department of Earth System  
13 Science, Tsinghua University, Beijing 100084, China

14 \* Corresponding author, [pernille.nilsson@ibv.uio.no](mailto:pernille.nilsson@ibv.uio.no)

15

16 **Abstract**

17 The great gerbil (*Rhombomys opimus*) is a social rodent living in permanent, complex burrow  
18 systems distributed throughout Central Asia, where it serves as the main host of several  
19 important vector-borne infectious diseases and is defined as a key reservoir species for  
20 plague (*Yersinia pestis*). Studies from the wild have shown that the great gerbil is largely  
21 resistant to plague but the genetic basis for resistance is yet to be determined. Here, we  
22 present a highly contiguous annotated genome assembly of great gerbil, covering over 96 %  
23 of the estimated 2.47 Gb genome. Comparative genomic analyses focusing on the immune

24 gene repertoire, reveal shared gene losses within *TLR* gene families (i.e. *TLR8*, *TLR10* and all  
25 members of *TLR11*-subfamily) for the Gerbillinae lineage, accompanied with signs of  
26 diversifying selection of *TLR7* and *TLR9*. Most notably, we find a great gerbil-specific  
27 duplication of the *MHCII DRB* locus. *In silico* analyses suggest that the duplicated gene  
28 provides high peptide binding affinity for *Yersinia* epitopes. The great gerbil genome  
29 provides new insights into the genomic landscape that confers immunological resistance  
30 towards plague. The high affinity for *Yersinia* epitopes could be key in our understanding of  
31 the high resistance in great gerbils, putatively conferring a faster initiation of the adaptive  
32 immune response leading to survival of the infection. Our study demonstrates the power of  
33 studying zoonosis in natural hosts through the generation of a genome resource for further  
34 comparative and experimental work on plague survival and evolution of host-pathogen  
35 interactions.

36

## 37 **Main**

38 The great gerbil (*Rhombomys opimus*) is a key plague reservoir species of Central Asia [1]  
39 whose habitat stretches from Iran to Kazakhstan to North Eastern China. This diurnal,  
40 fossorial rodent lives in arid and semi-arid deserts, and forms small family groups that reside  
41 in extensive and complex burrow systems with a large surface diameter and multiple  
42 entrances, food storage and nesting chambers [2]. Where great gerbil communities coincide  
43 with human settlements and agriculture they are often viewed as pests through the  
44 destruction of crops and as carriers of vector-borne diseases [3-5]. Great gerbil is a dominant  
45 plague host species in nearly a third of the plague reservoirs located in the vast territories of  
46 Russia, Kazakhstan and China [6].

47

48 Plague, caused by the gram-negative bacterium *Yersinia pestis*, is a common disease in  
49 wildlife rodents living in semi-arid deserts and montane steppes, as well as in tropical  
50 regions [7,8]. It is predominantly transmitted between rodents by fleas living on rodents or  
51 in rodent nests [9] and regularly spills over into human populations [10], leading to  
52 individual cases and sometimes localized plague outbreaks [11]. Historically, spillover has  
53 resulted in three major human pandemics and continues to cause annual outbreaks of  
54 human plague cases in Madagascar [12-14]. Humans have played an important role in  
55 spreading the disease globally [15]. However, they are generally dead-end hosts and the  
56 long-term persistence of plague depends on plague reservoirs, which are areas where the  
57 biotic and abiotic conditions are favoring the bacterium's survival [5].

58

59 Most commonly plague enters the body through a subcutaneous flea-bite of an infected flea,  
60 being deposited in the dermal tissue of the skin [9,16]. Once the primary physical barriers of  
61 the mammalian immune defense have been breached, the pathogen encounters a diverse  
62 community of innate immune cells and proteins evolved to recognize and destroy invasive  
63 pathogens. Here, Toll-like receptors (TLRs) and other pattern recognition receptors (PRRs)  
64 are at the forefront and have a vital role in the recognition and initiation of immune  
65 responses. Stimulation of adaptive immunity is in turn governed by the major  
66 histocompatibility complex (MHCs). MHC class I (MHCI) and class II (MHCII) proteins present  
67 antigens to CD8+ and CD4+ T lymphocytes, respectively. In particular, the CD4+ T  
68 lymphocyte is a master activator and regulator of adaptive immune responses [17,18].

69

70 In host-pathogen interactions, both sides evolve mechanisms to overpower the other  
71 engaging in an evolutionary arms race that shapes the genetic diversity on both sides [19,20].

72 *Y. pestis* evoke a specialized and complex attack to evade detection and destruction by the  
73 mammalian immune system to establish infection [21]. Upon entering a mammalian host,  
74 the change in temperature to 37°C initiates a change in bacterial gene expression switching  
75 on a wealth of virulence genes whose combined action enables *Y. pestis* to evade both  
76 extracellular and intracellular immune defenses [22] at the site of infection, in the lymph  
77 node and finally in the colonized blood-rich organs [16,23-26]. The host, in addition to  
78 standard immune responses, will have to establish counter measures to overcome the *Y.*  
79 *pestis* strategy of suppressing and delaying the innate immune responses [27,28]. This  
80 includes recognition of pathogen, resisting the bacterial signals that induce apoptosis of  
81 antigen presenting cells (APCs) and successfully producing an inflammatory response that  
82 can overpower the infection while avoiding hyperactivation.

83

84 Like all main plague reservoir hosts great gerbils can cope remarkably well with plague  
85 infections with only a minor increase in mortality levels compared to the natural mortality  
86 (see [10,29] for details). In a laboratory setting, a very large dose of *Y. pestis* is required  
87 before a lethal dose is reached where half the injected animals die (LD50) [30]. Variation in  
88 plague resistance do exists between individual great gerbils [30] however, the genetic basis  
89 of plague resistance and the differences in survival is still unclear. The adaptive immune  
90 system requires several days to respond to an infection and *Y. pestis* progresses so rapidly  
91 that it can kill susceptible hosts within days. Consequently, the genetic background of the  
92 innate immune system could potentially play a pivotal part in plague survival and also  
93 contribute to the observed heterogeneity in plague resistance [31]. For a successful  
94 response the innate immune system would have to keep the infection in check whilst  
95 properly activating the adaptive immune system [18], which can then mount an appropriate

96 immune response leading to a more efficient and complete clearance of the pathogen.  
97 Previous studies investigating plague resistance have indeed implicated components of both  
98 innate [32-38] and adaptive immunity [39,40]. Although, none of these studies have involved  
99 wild reservoir hosts in combination with whole-genome sequencing, an approach with  
100 increased resolution that can be used in a comparative genomic setting to investigate  
101 adaptation, evolution and disease.

102

103 The importance of studying (the genetics/genomics of) zoonosis in their natural hosts is  
104 increasingly recognized [41] and the advances in sequencing technology has made it possible  
105 and affordable to do whole-genome sequencing of non-model species for individual and  
106 comparative analysis of hosts facing a broad range of zoonosis [41].

107 In this paper, we present a *de novo* whole-genome sequence assembly of the major plague  
108 host, the great gerbil. We use this new resource to investigate the genomic landscape of  
109 innate and adaptive immunity with focus on candidate genes relevant for plague resistance  
110 such as *TLRs* and MHC, through genomic comparative analyses with the closely related  
111 plague hosts Mongolian gerbil (*Meriones unguiculatus*) and sand rat (*Psammomys obesus*)  
112 and other mammals.

113

## 114 **Results**

### 115 **Genome assembly and annotation**

116 We sequenced the genome of a wild-caught male great gerbil, sampled from the Xinjiang  
117 Province in China, using the Illumina HiSeq 2000/2500 platform (Additional file 2: Table S1  
118 and S2). The genome was assembled *de novo* using ALLPATHS-LG resulting in an assembly  
119 consisting of 6,390 scaffolds with an N50 of 3.6 Mb and a total size of 2.376 Gb (Table 1),

120 thus covering 96.4 % of the estimated genome size of 2.47 Gb. Assembly assessment with  
121 CEGMA and BUSCO, which investigates the presence and completeness of conserved  
122 eukaryotic and vertebrate genes, reported 85.88 % and 87.5 % gene completeness,  
123 respectively (Table 1). We were also able to locate all 39 *HOX* genes conserved in four  
124 clusters on four separate scaffolds through gene mining (Additional file 1: Fig S1). Further  
125 genome assessment with Blobology, characterizing possible contaminations, demonstrated  
126 a low degree of contamination, reporting that more than 98.5 % of the reads/bases had top  
127 hits of Rodentia. Thus, no scaffolds were filtered from our assembly.  
128 Annotation was performed using the MAKER2 pipeline and resulted in 70 974 predicted  
129 gene models of which 22 393 protein coding genes were retained based on default filtering  
130 on Annotation Edit Distance score (AED<1).

131

132 Table 1. Great gerbil genome assembly statistics.

| <b>Assembly metrics</b>                  |                   |
|------------------------------------------|-------------------|
| Total size of scaffolds (bp)             | 2 376 008 858     |
| Estimated genome size (bp)               | 2 464 792 293     |
| Number of scaffolds                      | 6 389             |
| Scaffold N50 (bp)                        | 3 610 217         |
| Longest scaffold (bp)                    | 16 185 803        |
| Total size of contigs (bp)               | 2 216 488 676     |
| Number of contigs                        | 106 018           |
| Contig N50 (bp)                          | 56 880            |
| <b>Assembly validation</b>               |                   |
| Complete CEGMA <sup>a</sup> genes        | 85.88 % (213/248) |
| Partial CEGMA genes                      | 95.16 % (236/248) |
| Complete Single-copy BUSCOs <sup>b</sup> | 2 114 (69.9 %)    |
| Complete duplicated BUSCOs               | 21 (0.69 %)       |
| Fragmented BUSCOs                        | 533 (17.6 %)      |
| Missing BUSCOs                           | 377 (12.5 %)      |
| Total BUSCOs searched                    | 3 023             |

133 <sup>a</sup> Based on 248 highly Conserved Eukaryotic Genes (CEGs), <sup>b</sup> Based on 3,023 vertebrate-specific

134 BUSCO genes

135 Legend: The table details scaffold and contig assembly statistics as well as results from the assembly  
136 validation on genic completeness with CEGMA and BUSCO.

137

### 138 **Reduced TLR repertoire in great gerbil and Gerbillinae**

139 We characterized the entire *TLR* genetic repertoire in the great gerbil genome and found 13  
140 *TLRs*: *TLR1-13* (Fig. 1). Of these, *TLR1-7* and *TLR9* were complete with signal peptide, ecto-  
141 domain, transmembrane domain, linker and Toll/interleukin 1 receptor (TIR) domain that  
142 phylogenetically clustered well within each respective subfamily (Table 2 and Fig.2). For the  
143 remaining five *TLRs*, we were only able to retrieve fragments of *TLR8* and *TLR10* genes and  
144 although sequences of *TLR11-13* were near full length, all three members of the *TLR11*  
145 subfamily are putative non-functional pseudogenes as they contain numerous point  
146 mutations that creates premature stop codons and frameshift-causing indels. In addition,  
147 *TLR12* contains a large deletion of 78 residues (Additional file 1: Figure S2). For *TLR8*, the  
148 recovered sequence almost exclusively covers the conserved TIR domain. Relative synteny of  
149 *TLR7* and *TLR8* on chromosome X is largely conserved in both human and published rodent  
150 genomes, as well as in the great gerbil with the fragments of *TLR8* being located upstream of  
151 the full-length sequence of *TLR7* on scaffold00186 (Additional file 1: Figure S3). The great  
152 gerbil *TLR10* fragments are located on the same scaffold as full-length *TLR1* and *TLR6*  
153 (scaffold00357), in a syntenic structure comparable to other mammals (Additional file 1:  
154 Figure S3). In addition to being far from full-length sequences, the pieces of *TLR8* and *TLR10*  
155 in the great gerbil genome have point mutations that creates premature stop codons and  
156 frameshift-causing indels (Additional file 1: Figure S2). The same *TLR* repertoire is seen in  
157 great gerbils' closest relatives, Mongolian gerbil and sand rat, with near full-length  
158 sequences of *TLR12* and *TLR13* and shorter fragments of *TLR8* and *TLR10*. Interestingly, for

159 *TLR11* only shorter fragments were located for these two species, which is in contrast to the  
 160 near full-length sequence identified in great gerbil. Moreover, also in these two species  
 161 premature stop codons and indel-causing frameshifts were present in both the near full-  
 162 length and fragmented genes (Fig. 1 and Additional file 1: Figure S2).  
 163

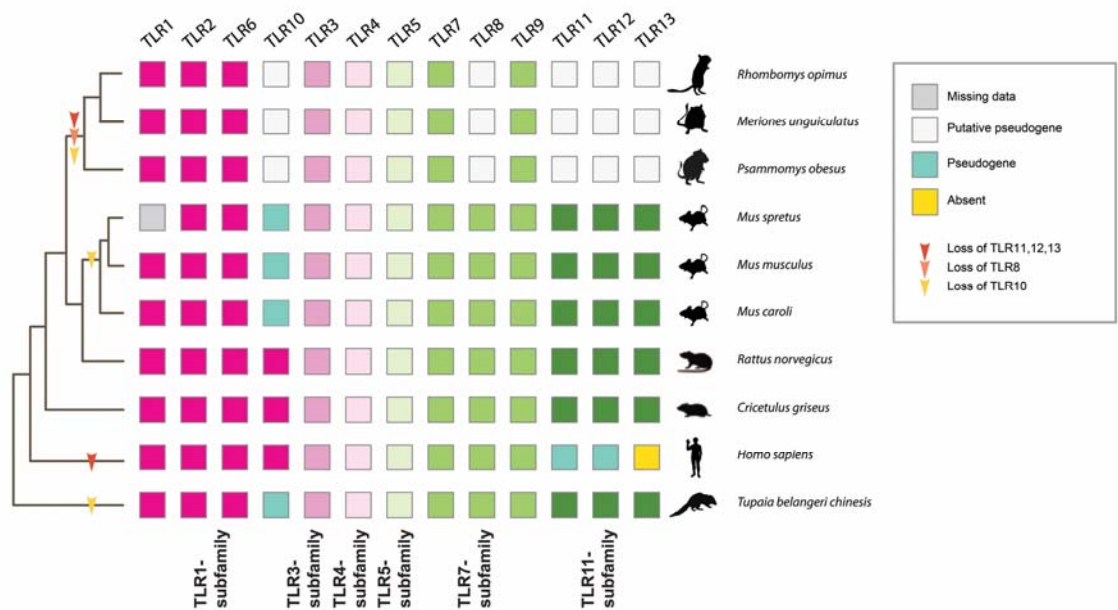

164  
 165 **FIG. 1 TLR repertoire in Gerbillinae compared to members of Rodentia, human and Chinese**  
 166 **tree shrew**

167 **FIG. 1** *TLR* repertoire of the investigated Gerbillinae, Rodentia, human and Chinese tree shrew  
 168 mapped onto a composite cladogram (see Additional file 1: Figure S4). The lineage specific loss of  
 169 *TLR8* and all members of the *TLR11-subfamily* in Gerbillinae and other lineage-specific *TLR* losses are  
 170 marked by arrows. Depicted in boxes colored by the six major subfamilies are the individual species'  
 171 *TLR* repertoires: *TLR1-subfamily* (dark pink), *TLR3-subfamily* (pink), *TLR4-subfamily* (light pink), *TLR5-*  
 172 *subfamily* (light green), *TLR7-subfamily* (green) and *TLR11-subfamily* (dark green). Teal colored boxes  
 173 represent established pseudogenes, empty (white) boxes indicate putative pseudogenes, yellow  
 174 boxes indicate complete absence of genes and grey boxes represent missing information.



175

176 **Table 2. Overview of *TLRs* in great gerbil and their location in the genome assembly.**

| Gene         | Scaffold      | Strand | Start                  | End       | Size (aa) | Full-length coding sequence |
|--------------|---------------|--------|------------------------|-----------|-----------|-----------------------------|
| <i>TLR1</i>  | scaffold00357 | +      | 837 967                | 840 348   | 794       | Yes                         |
| <i>TLR2</i>  | scaffold00513 | +      | 45 595                 | 47 946    | 784       | Yes                         |
| <i>TLR3</i>  | scaffold00205 | -      | 1 713 605              | 1 703 075 | 905       | Yes                         |
| <i>TLR4</i>  | scaffold00158 | +      | 3 555 106              | 3 573 424 | 838       | Yes                         |
| <i>TLR5</i>  | scaffold00165 | -      | 2 379 076              | 2 376 503 | 858       | Yes                         |
| <i>TLR6</i>  | scaffold00357 | +      | 820 802                | 823 186   | 795       | Yes                         |
| <i>TLR7</i>  | scaffold00186 | -      | 3 421 186 <sup>a</sup> | 3 418 040 | 1049      | Yes <sup>b</sup>            |
| <i>TLR8</i>  | scaffold00186 | -      |                        |           | 130       | No <sup>c</sup>             |
| <i>TLR9</i>  | scaffold00044 | +      | 7 083 426 <sup>a</sup> | 7 086 521 | 1032      | Yes <sup>b</sup>            |
| <i>TLR10</i> | scaffold00357 | +      |                        |           | 341       | No                          |
| <i>TLR11</i> | scaffold00001 | +      |                        |           | 917       | Yes <sup>d</sup>            |
| <i>TLR12</i> | scaffold00071 | -      | 4 008 732              | 4 006 236 | 817       | No <sup>d</sup>             |
| <i>TLR13</i> | scaffold00845 | -      |                        |           | 899       | Yes <sup>d</sup>            |

177 <sup>a</sup> Start of second codon in sequence

178 <sup>b</sup> Missing start codon

179 <sup>c</sup> Close to complete TIR domain plus c-terminal

180 <sup>d</sup> Contains multiple point mutations and indels causing frameshifts

181 Legend: The table details which scaffolds and in what orientation each *TLR* is located as well as

182 coordinates for the start and end of each gene (except for the pseudogenes) on the respective

183 scaffolds. Information on the size of the translated amino acid sequence and whether it is complete

184 is also shown.

185

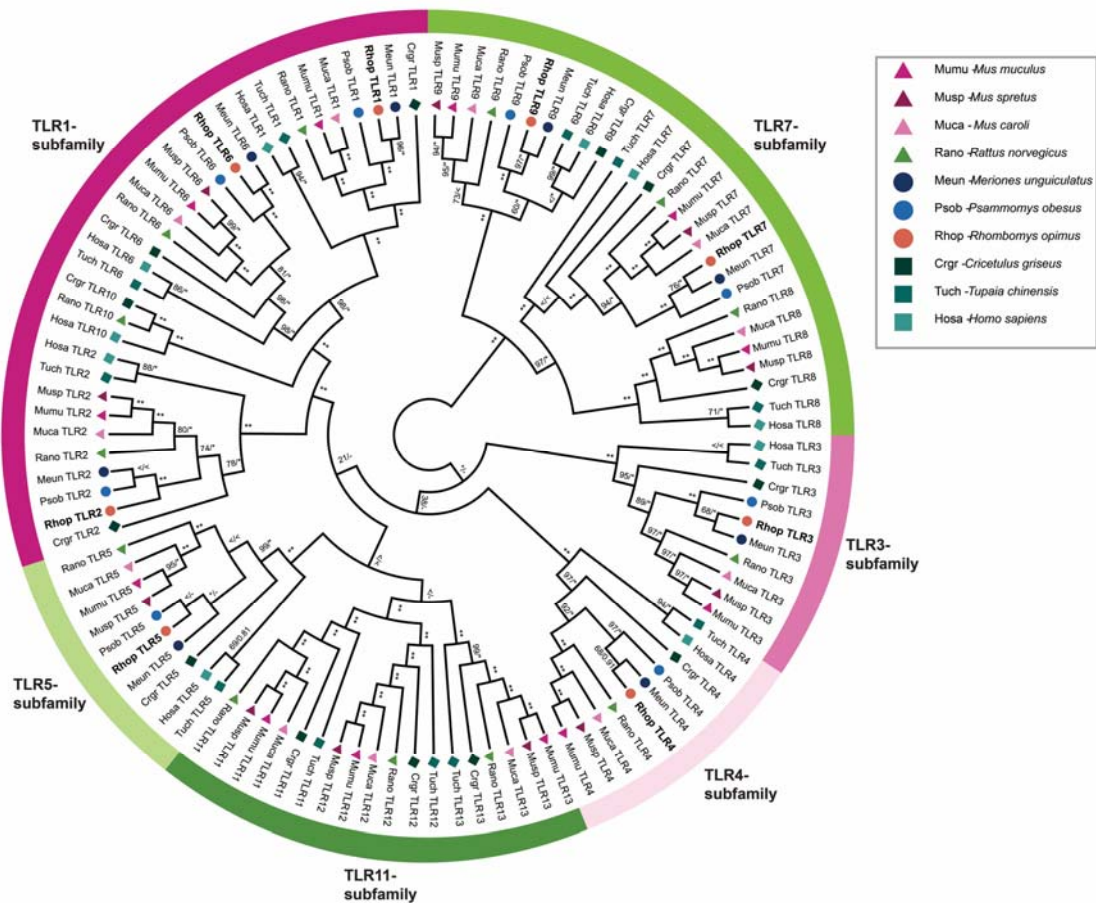

186

187 **FIG.2 ML-phylogeny of full-length TLRs present in all investigated Gerbillinae, Rodentia,**  
 188 **human and Chinese tree shrew**

189 **FIG.2 A** Maximum likelihood (ML) phylogeny of nucleotide sequences all full-length *TLRs* was created  
 190 using RAXML with 100x topology and 500x bootstrap replicates. A MrBayes phylogeny with  
 191 20,000,000 generations and 25 % burn-in was also created and the posterior probabilities added to  
 192 the RAXML phylogeny. Great gerbil genes are marked in bold and by orange circles. The six major *TLR*  
 193 subfamilies are marked with colored bars and corresponding names. All investigated *TLRs* including  
 194 great gerbil's, cluster well within each subfamily as well as being clearly separated into each *TLR*  
 195 subfamily member.

196

197 **Diversifying selection of *TLRs***

198 To explore possible variations in selective pressure across the species in our analysis, we ran  
199 the adaptive branch-site random effects model (aBSREL) on all full-length *TLRs*. Evidence of  
200 episodic positive selection was demonstrated for the Gerbillinae lineage for *TLR7* and *TLR9*  
201 and for the Mongolian gerbil *TLR7* specifically (Additional file 1: Figure S5 and S6).  
202 Additionally, all full-length great gerbil *TLRs* were analyzed for sites under selection using  
203 phylogeny guided mixed effects model of evolution (MEME), from the classic datamonkey  
204 and datamonkey version 2.0 websites. Reported sites common between both analyses for all  
205 full-length *TLRs* at p-value 0.05 and their distribution among each domain of the proteins are  
206 listed in Additional file 2: Table S3. Overall, the sites under selection were almost exclusively  
207 located in the ecto-domains with a few sites located in the signal peptide (*TLR3*, *TLR6* and  
208 *TLR9*) and in the Linker and TIR domains (*TLR1*, *TLR2*, *TLR4* and *TLR5*). The 3D protein  
209 structure of *TLR4*, *TLR7* and *TLR9* modelled onto the human *TLR5* structure further  
210 demonstrated that the sites are predominantly located in loops interspersed between the  
211 leucine-rich repeats (Additional file 1: Figures S7-9).

212

213 Scrutiny of the *TLR4* amino acid sequence alignment revealed drastic differences in the  
214 properties of the residues at two positions reported to be important for maintaining  
215 signaling of hypoacetylated lipopolysaccharide (LPS). In rat (*Rattus norvegicus*) and all mouse  
216 species used in this study, the residues at position 367 and 434 are basic and positively  
217 charged while for the remaining species in the alignment including all Gerbillinae, the  
218 residues are acidic and negatively charged.

219

220 **Characterization of the great gerbil class I MHC region**

221 The overall synteny of the MHCII region is well conserved in great gerbil, displaying the same  
222 translocation of some *MHCI* genes upstream of the MHCII region as demonstrated in mouse  
223 and rat i.e. with a distinct separation of the MHCII region into two clusters (Fig. 3). Some of  
224 the great gerbil copies were not included in the phylogeny due to missing data, which  
225 hindered their annotation. Additionally, the annotation was obstructed either by the copies  
226 being located on scaffolds not containing framework genes or due to variation in the micro-  
227 synteny of those particular loci of *MHCIIa* and *MHCIIb* between mouse, rat and great gerbil  
228 (Fig. 3). From the synteny it appears that *MHCI* genes are missing in the region between  
229 framework genes *Trim39* and *Trim26* and possibly between *Bat1* and *Pou5f1* in the great  
230 gerbil. For full gene names for these and other framework genes mentioned below, see  
231 Additional file 2: Table S4.

232

233 We were able to identify six scaffolds containing *MHCI* genes (Fig. 3 and Additional file 2:  
234 Table S5). Four of the scaffolds contained framework genes that enabled us to orient them. In  
235 total, we located 16 *MHCI* copies, of which we were able to obtain all three  $\alpha$  domains for 10  
236 of the copies. Three copies contain 2 out of 3 domains while for the last three copies we  
237 were only able to locate the  $\alpha 3$  domain. In one instance, the missing  $\alpha$  domain was due to  
238 an assembly gap. Reciprocal BLAST confirmed hits as *MHCI* genes. Due to high similarity  
239 between different *MHCI* lineages annotation of identified sequences was done through  
240 phylogenetic analyses and synteny. Our phylogeny reveals both inter- and intraspecific  
241 clustering of the great gerbil *MHCI* genes with other rodent genes with decent statistical  
242 support (i.e. bootstrap and/or posterior probabilities) of the internal branches (Fig. 4). Five  
243 great gerbil *MHCI* genes (RhopA1-5) cluster together in a main monophyletic clade while the  
244 remaining copies cluster with mouse and rat *MHCIIb* genes. Two of the copies (Rhop-A3 $\psi$

245 and Rhop-M6ψ) appear to be pseudogenes as indicated by the presence of point mutations  
 246 and frameshift-causing indels. Additionally, our phylogeny displays a monophyletic  
 247 clustering of human *MHCI* genes (Fig. 4). The clade containing five of the great gerbil *MHCI*  
 248 genes (Rhop-A1-5) possibly include a combination of both classical (*MHCIIa*) and non-classical  
 249 (*MHCIIb*) genes as is the case for mouse and rat, where certain *MHCIIb* genes cluster closely  
 250 with *MHCIIa* genes (Fig. 3 and Fig. 4). Also, due to the high degree of sequence similarity of  
 251 rodent *MHCI* genes the phylogenetic relationship between clades containing non-classical M  
 252 and T *MHCI* genes could not be resolved by sufficient statistical support.  
 253

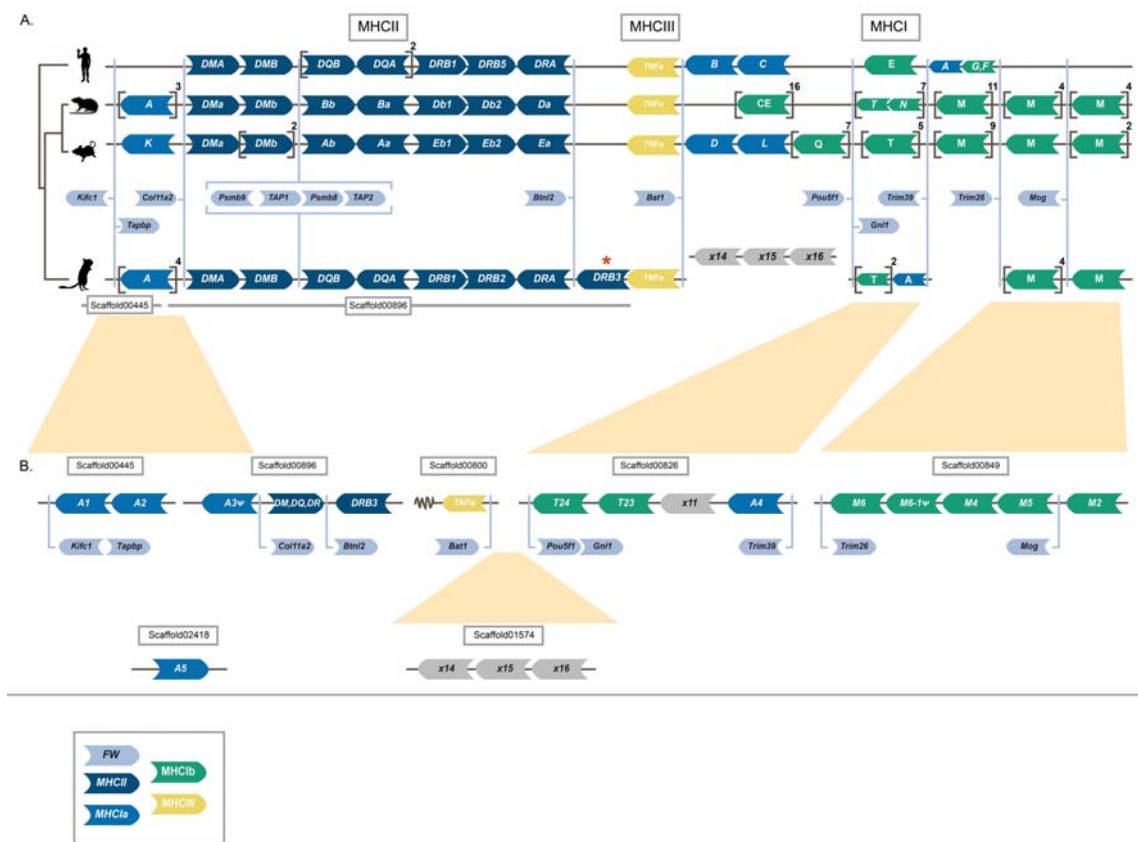

254  
 255 **FIG. 3 Synteny of genes in the Major histocompatibility (MHC) region of human, rat, mouse**  
 256 **and gerbil**

257 **FIG 3** Genomic synteny of genes in the MHC regions of human, mouse, rat and great gerbil mapped  
258 onto a cladogram. Genes are represented by arrow-shaped boxes indicating the genomic orientation.  
259 The boxes are colored by class region and for class I by classical (Ia) or non-classical (Ib) subdivision:  
260 Framework (FW) genes (light blue), *MHCII* (dark blue), *MHCIIa* (blue), *MHCIII* (yellow) and *MHCIIb*  
261 (green). Square brackets indicate multiple gene copies not displayed for practical and visualization  
262 purposes, but copy number is indicated outside in superscript. Due to limitations in space and to  
263 emphasize the conserved synteny of FW genes across lineages, the genes are placed in between the  
264 general syntenies and their respective locations are indicated by light blue lines. The light blue  
265 brackets surrounding the *Psmb* and *TAP* genes indicates their constitutive organization. Putative  
266 pseudogenes are denoted with  $\psi$ . For visualization purposes, genes of the *DP* (termed H in rat) and  
267 *DO* (termed O in mouse) loci are excluded. The location of all great gerbil *MHCII* genes including  
268 *Rhop-DP* and *Rhop-DO* can be found in Table 3. (A) Synteny of all MHC regions detailing *MHCI* and *II*.  
269 Panel (B) further details the genomic locations of great gerbil *MHCI* genes as indicated by the  
270 presence of FW genes located on the scaffolds and inferred from synteny comparisons with human,  
271 rat and mouse regions and phylogenetic analysis (see Fig. 4).  
272 The overall synteny of the *MHCI* and *II* regions are very well conserved in great gerbil displaying the  
273 same translocation of *MHCI* genes upstream of *MHCII* as seen in mouse and rat and resulting in the  
274 separation of the *MHCI* region into two. Most notably, for *MHCII* there is a duplication of a  $\beta$  gene of  
275 the *DR* locus in great gerbil (highlighted by a red asterix) whose orientation has changed and is  
276 located downstream of the FW gene *Btnl2* that normally represents the end of the *MHCII* region.  
277

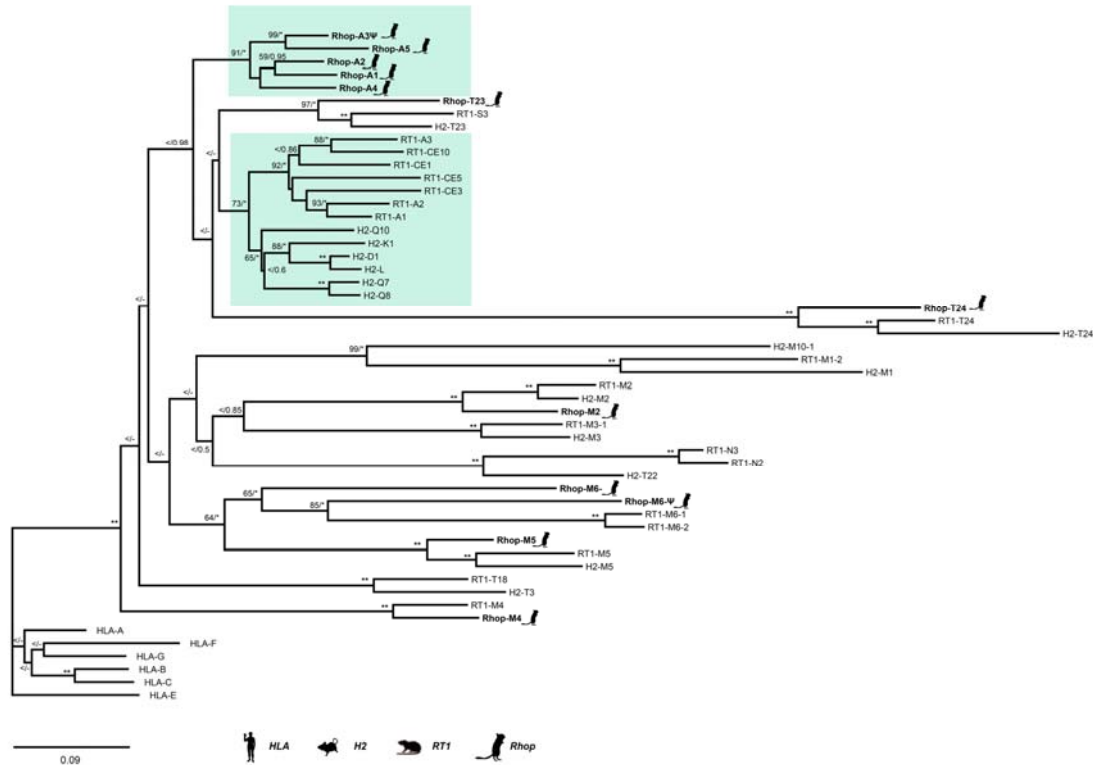

278

279 **FIG. 4 A ML-phylogeny made of nucleotide sequences of the three alpha domains from**  
280 **MHCI**

281 **FIG.4 A** Maximum likelihood phylogeny of nucleotide sequences containing the three  $\alpha$  domains of  
282 *MHCI* was created using RAXML with 100x topology and 500x bootstrap replicates. A MrBayes  
283 phylogeny with 20,000,000 generations and 25 % burn-in was also created and the posterior  
284 probabilities added to the RAXML phylogeny. BS/PP; “\*” = BS 100 or PP > 0.96; “\*\*” = BS of 100 and  
285 PP>0.97; “<” = support values below 50/0.8 and “-” = node not present in Bayesian analysis. Twelve  
286 of the 16 great gerbil sequences were used in the analysis and are marked with a gerbil silhouette  
287 and in bold lettering. The remaining four *MHCI* sequences were excluded from the phylogenetic  
288 analyses due to missing data exceeding the set threshold of 50 %. The clusters containing *MHCIIa*  
289 (classical *MHCI*) and the closest related *MHCIIb* genes are marked by teal boxes. Putative  
290 pseudogenes are denoted with  $\psi$ .

291

## 292 **Characterization of the great gerbil class II MHC region**

293 A single scaffold (scaffold00896) of 471 076 bp was identified to contain all genes of the  
294 MHCII region, flanked by the reference framework genes *Col11a2* and *Btnl2*. We were able  
295 to obtain orthologues of  $\alpha$  and  $\beta$  genes of the classical MHCII molecules DP, DQ and DR as  
296 well as for the 'non-classical' DM and DO molecules (Table 3). The antigen-processing genes  
297 for the class I presentation pathway, *Psmb9*, *TAP1*, *Psmb8* and *TAP2* also maps to  
298 scaffold00896 (Fig. 3). Synteny of the MHCII region was largely conserved in great gerbil  
299 when compared to mouse, rat and human regions except for a single duplicated copy of  
300 *Rhop-DRB* (*Rhop-DRB3*) that was located distal to the *Btnl2* framework gene representing  
301 the border between class II and III of the MHC region (Fig. 3). The duplicated copy of the  
302 *Rhop-DRB* gene has an antisense orientation in contrast to the other copies of the *Rhop-DRB*  
303 genes in great gerbil. In rodents, the DR locus contains a duplication of the  $\beta$  gene and the  
304 two copies are termed  $\beta 1$  and  $\beta 2$ , with the  $\beta 2$  gene being less polymorphic than the highly  
305 polymorphic  $\beta 1$  gene. The relative orientation of the  $\beta$  and  $\alpha$  genes of the DR locus is  
306 conserved in most eutherian mammals studied to date with the genes facing each other, as  
307 is the case for Rhop-DRB1, Rhop-DRB2 and Rhop-DRA (Fig. 3). Sequence alignment and a  
308 maximum likelihood (ML) phylogeny establishes Rhop-DRB3 to be a duplication of Rhop-  
309 DRB1 (Fig. 5). Rhop-DRB1 and Rhop-DRB3 are separated by around 80 kb containing *Rhop-*  
310 *DRB2*, *Rhop-DRA* and five assembly gaps (Table 3).

311

312 Any similar duplication of the *Rhop-DRB1* gene is not seen in either of the two close family  
313 members of the Gerbillinae subfamily used in our comparative analyses. BLAST searches of  
314 the sand rat genome returned a single full-length copy of the  $\beta 1$  gene and a near full-length  
315 copy of the  $\beta 2$  gene (Fig. 5 and Additional file 2: Table S6). According to the annotations of



316 the Mongolian gerbil genome provided by NCBI, this species contains two copies of the DR  
317 locus  $\beta$  genes. A manual tBLASTn search using the protein sequences of Mongolian gerbil  
318 *DRB* genes to search the genome assembly did not yield additional hits of  $\beta$  genes in this  
319 locus that could have been missed in the automatic annotation process. The phylogeny  
320 confirms the copies found in Mongolian gerbil to be  $\beta 1$  and  $\beta 2$  genes (Fig. 5).

321

322 **Table 3. Overview of great gerbil *MHCII* genes and their location in the genome assembly.**

| Gene             | Scaffold      | Strand | Start   | End     | Size (aa) | Full-length coding sequence |
|------------------|---------------|--------|---------|---------|-----------|-----------------------------|
| <i>Rhop-DPB</i>  | scaffold00896 | -      | 116 069 | 105 406 | 264       | Yes                         |
| <i>Rhop-DPA</i>  | scaffold00896 | +      | 117 514 | 120 092 | 252       | Yes                         |
| <i>Rhop-DOA</i>  | scaffold00896 | +      | 125 319 | 127 406 | 241       | Yes <sup>a</sup>            |
| <i>Rhop-DMa</i>  | scaffold00896 | +      | 166 162 | 168 926 | 265       | Yes <sup>b</sup>            |
| <i>Rhop-DMb</i>  | scaffold00896 | +      | 175 763 | 182 090 | 257       | Yes                         |
| <i>Rhop-DOB</i>  | scaffold00896 | +      | 239 915 | 245 006 | 172       | No <sup>c</sup>             |
| <i>Rhop-DQB</i>  | scaffold00896 | +      | 271 007 | 278 482 | 231       | No <sup>d</sup>             |
| <i>Rhop-DQA</i>  | scaffold00896 | -      | 294 074 | 290 301 | 255       | Yes                         |
| <i>Rhop-DRB1</i> | scaffold00896 | +      | 310 644 | 319 368 | 265       | Yes                         |
| <i>Rhop-DRB2</i> | scaffold00896 | +      | 326 384 | 347 931 | 272       | Yes <sup>e</sup>            |
| <i>Rhop-DRA</i>  | scaffold00896 | -      | 355 351 | 351 425 | 254       | Yes                         |
| <i>Rhop-DRB3</i> | scaffold00896 | -      | 403 768 | 395 068 | 265       | Yes                         |

323 <sup>a</sup> Missing final residue and stop codon due to conserved overlapping splice site

324 <sup>b</sup> Unable to locate a stop codon. The structure of the final two exons is conserved among human,  
325 mouse and rat with the ultimate residue overlapping the splice site. The final coding exon therefore  
326 only contains two bp and the stop codon making it hard to determine the location of the final exon in  
327 the gerbil without supporting RNA information.

328 <sup>c</sup> Missing 99 residues (121-219) due to assembly gap

329 <sup>d</sup> Start location is that of exon 2 as exon 1 is missing due to an assembly gap.

330 <sup>e</sup> The cytoplasmic tail of  $\beta 2$  genes are encoded by an exon with no known homology to other exons in  
331 the MHC II genes and has a low degree of homology between mouse and rat [42]. There is therefore  
332 some uncertainty related to the completeness of the final exon of *Rhop-DRB2*.

333 Legend: The table details the assigned great gerbil gene names, which scaffold and in what  
334 orientation they are located as well as genomic location on the scaffold for start and end of the  
335 genes. Information on the size of the translated amino acid sequence and whether it is complete is  
336 also shown.  
337

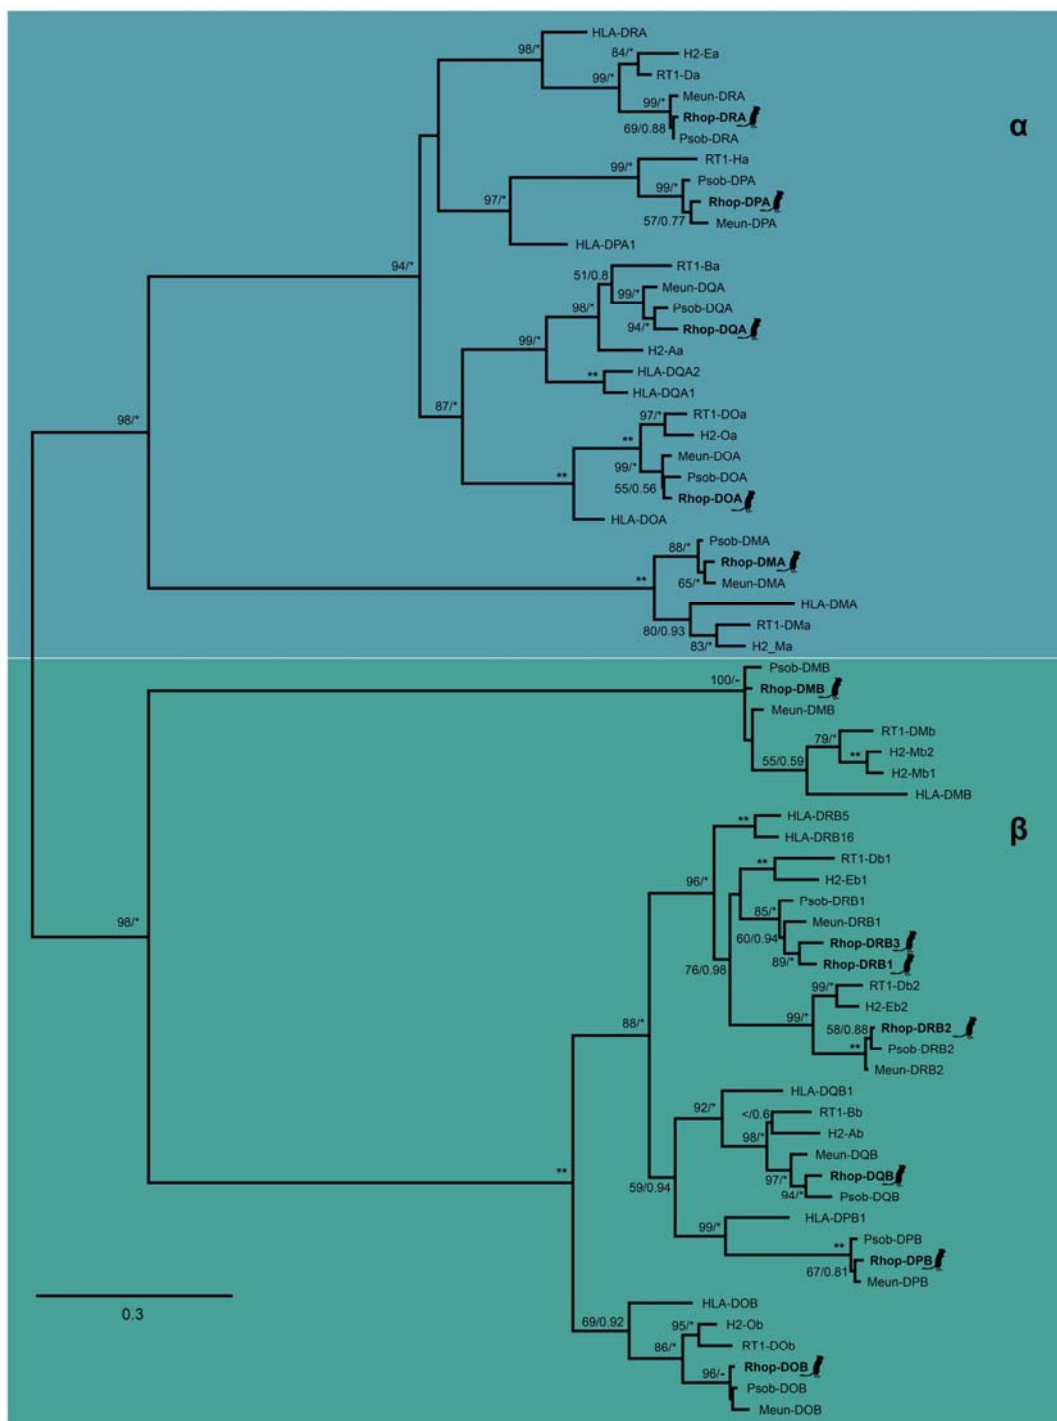

338 HLA H2 RT1 Rhop Meun Psob

338

339 FIG. 5 A ML-phylogeny made of nucleotide sequences of domains only from MHCII  $\alpha$  and  $\beta$

340 genes

341 **FIG.5** A Maximum likelihood phylogeny of nucleotide sequences containing the  $\alpha$  and  $\beta$  domains of  
342 *MHCII*  $\alpha$  and  $\beta$  genes was created using RAxML with 100x topology and 500x bootstrap replicates. A  
343 MrBayes phylogeny with 20,000,000 generations and 25 % burn-in was also created and the  
344 posterior probabilities added to the RAxML phylogeny. BS/PP; “\*” = BS 100 or PP > 0.96; “\*\*\*” = BS of  
345 100 and PP>0.97; “<” = support values below 50/0.8 and “-” = node not present in Bayesian analysis.  
346 Great gerbil genes are indicated with bold lettering and by silhouettes. The 12 great gerbil *MHCII*  
347 genes located in the genome assembly cluster accordingly with the orthologues of human, mouse,  
348 rat, sand rat and Mongolian gerbil. The *Rhop-DRB* duplication (*Rhop-DRB3*) cluster closely with the  
349 *Rhop-DRB1* and other *DRB1* orthologs with good support. The nomenclature of *MHCII* genes in  
350 Gerbillinae are in concordance with the recommendations of the MHC Nomenclature report [43].

351

### 352 ***MHCII DRB* promoters**

353 *MHCII* genes each contain a proximal promoter with conserved elements (S-X-Y motifs) that  
354 are crucial for the efficient expression of the gene. We aligned the proximal promoter of the  
355  $\beta$  genes of the DR locus in great gerbil and the other investigated species to establish if the  
356 integrity of the promoter was conserved as well as examining similarities and potential  
357 dissimilarities causing the previously reported differences in transcription and expression of  
358  $\beta 1$  and  $\beta 2$  genes in rodents [42,44]. The alignment of the promoter region reveals the  
359 conserved structure and similarities within  $\beta 1$  and  $\beta 2$  genes as well as characteristic  
360 differences (Fig. 6 and Table 4). Clear similarities are seen for the proximal promoter regions  
361 of *Rhop-DRB1* and *Rhop-DRB3* to the other rodent and human  $\beta 1$  promoters, as illustrated  
362 by high sequence similarity and the presence of a CCAAT box just downstream of the Y motif  
363 in all investigated rodent  $\beta 1$  promoters. Notably, the CCAAT box is missing in  $\beta 2$  promoters.  
364 The crucial distance between the S and X motifs is conserved in all  $\beta$  genes and the integrity  
365 of the S-X-Y motifs is observable for *Rhop-DRB1* and *DRB3* promoters. However, both the S

366 and X box of *DRB2* are compromised by deletions in great gerbil. The deletion in the X box  
 367 severely disrupt the motif and reduce its size by half. An identical deletion in the X box is  
 368 seen in Mongolian gerbil while the sand rat X box sequence covering the deleted parts is  
 369 highly divergent from the conserved sequence found in the rest of the promoters (Fig. 6).  
 370 Furthermore, for the  $\beta 2$  genes, two deletions downstream of the motifs are shared among  
 371 all rodents in the alignment as well as an additional insertion observed in Gerbillinae  
 372 members.  
 373

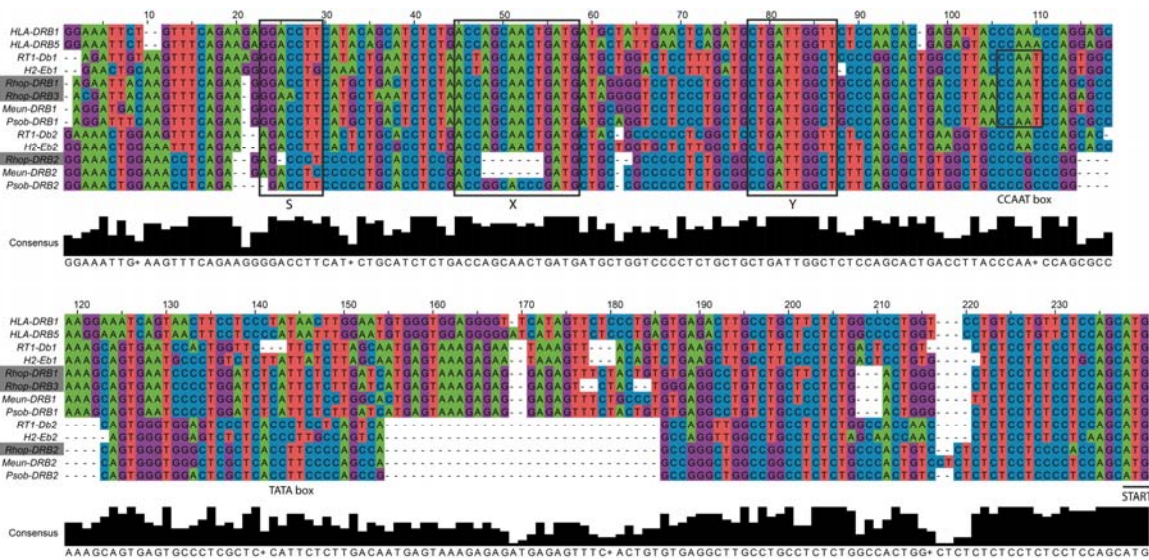

374  
 375 **FIG. 6 Alignment of the DR locus  $\beta 1$  and  $\beta 2$  proximal promoters**  
 376 **FIG. 6** Sequences of the proximal promoters of  $\beta 1$  and  $\beta 2$  genes of the DR locus (E locus in mouse  
 377 and D locus in rat) were aligned in MEGA7 [45] using MUSCLE with default parameters. The resulting  
 378 alignment was edited manually for obvious misalignments and transferred and displayed in Jalview  
 379 [46]. For visualization purposes only, the alignment was further edited in Adobe Illustrator (CS6),  
 380 changing colors of the bases and adding boxes to point out the S-X-Y motifs. The three copies of *DRB*  
 381 genes located in the great gerbil genome are marked with grey boxes. The alignment shows clear  
 382 similarities of the proximal promoter region of *Rhop-DRB1* and *Rhop-DRB3* to the other rodent and

383 human  $\beta 1$  promoter sequences. For the *DRB2* genes, two deletions are shared among all rodents in  
384 the alignment as well as additional indels observed in Gerbillinae members. Most notably, both great  
385 gerbil and Mongolian gerbil have deletions of half the X box while sand rat X box sequences in that  
386 same position is highly divergent from the otherwise conserved sequence seen in the alignment.

387

388 **Table 4. Coordinates of MHCII S-X-Y motifs of the promoters of the DRB genes in**  
389 **investigated species.**

| Gene             | S-X spacing (bp) | X-Y spacing (bp) | S-X-Y Relative position (S-X-Y end to gene start) | CCAAT box         |
|------------------|------------------|------------------|---------------------------------------------------|-------------------|
| <i>HLA-DRB1</i>  | 15               | 19               | -145                                              | TATA box          |
| <i>HLA-DRB5</i>  | 15               | 19               | -146                                              |                   |
| <i>RT1-Db1</i>   | 15               | 19               | -137                                              | Yes               |
| <i>H2-Eb1</i>    | 15               | 19               | -139                                              | Yes +<br>TATA box |
| <i>Rhop-DRB1</i> | 15               | 19               | -141                                              | Yes               |
| <i>Rhop-DRB3</i> | 15               | 19               | -137                                              | Yes               |
| <i>Meun-DRB1</i> | 15               | 19               | -141                                              | Yes               |
| <i>Psob-DRB1</i> | 15               | 19               | -141                                              | Yes               |
| <i>RT1-Db2</i>   | 15               | 18               | -110                                              |                   |
| <i>H2-Eb2</i>    | 15               | 19               | -110                                              |                   |
| <i>Rhop-DRB2</i> | 15               | 17               | -109                                              |                   |
| <i>Meun-DRB2</i> | 15               | 18               | -111                                              |                   |
| <i>Psob-DRB2</i> | 15               | 18               | -109                                              |                   |

390 Legend: The overview details the relative coordinates for conserved motifs in the promoter regions  
391 of great gerbil (*Rhop-DRB*), sand rat (*Psob-DRB*), Mongolian gerbil (*Meun-DRB*), human (*HLA-DRB*),  
392 mouse (*H2-Eb*) and rat (*RT1-Db*) orthologous genes. The S-X and X-Y spacing refers to the distance  
393 between the S and X, and X and Y motifs, respectively. The S-X-Y Relative position show the distance  
394 (bp) between the end of the Y motif and the start codon of the gene.

395

396 **Peptide binding affinity predictions and expression of Rhop-DR MHCII**  
397 **molecules**

398 Mouse and rat  $\beta$ 2 molecules have been shown to have an extraordinary capacity to present  
399 the *Y. pseudotuberculosis* superantigen mitogen (YPm) [42]. We therefore investigated the  
400 peptide binding affinities of the Rhop-DR molecules by running translations of *Rhop-DRA* in  
401 combinations with each of the three *Rhop-DRB* genes through the NetMHCIIpan 3.2 server  
402 [47] along with peptide/protein sequences of YPm, *Y. pestis* F1 ‘capsular’ antigen and LcrV  
403 antigen. Universally, the Rhop-DRB3 shows an affinity profile identical to that of Rhop-DRB2  
404 displaying high affinity towards both *Y. pseudotuberculosis* and *Y. pestis* epitopes while  
405 Rhop-DRB1 does not (Fig.7 and Additional file 3). The translated great gerbil MHCII from DP  
406 and DQ loci were also tested for peptide binding affinity but only Rhop-DP displayed affinity  
407 to one of the epitopes tested. Furthermore, analyses of the translated amino acid sequences  
408 of sand rat DR (Psob-DR) molecules as well as published protein sequences of Mongolian  
409 gerbil DR (Meun-DR) molecules and the mouse ortholog H2-E confirmed the high affinity of  
410  $\beta$ 2 molecules to *Y. pseudotuberculosis* and *Y. pestis* (Additional file 1: Figure S10 and  
411 Additional file 3). The equal capacity of Rhop-DRB2 and Rhop-DRB3 to putatively present  
412 *Yersinia* combined with the proximal promoter investigations lead us to question the  
413 expression of DRB genes in great gerbil. Searching a set of raw counts of great gerbil  
414 expressed genes, reveal that Rhop-DRB1 and Rhop-DRB3 are both similarly expressed at  
415 similar levels while Rhop-DRB2 is not expressed or at undetectable levels (3936 and 2279 vs  
416 14).  
417

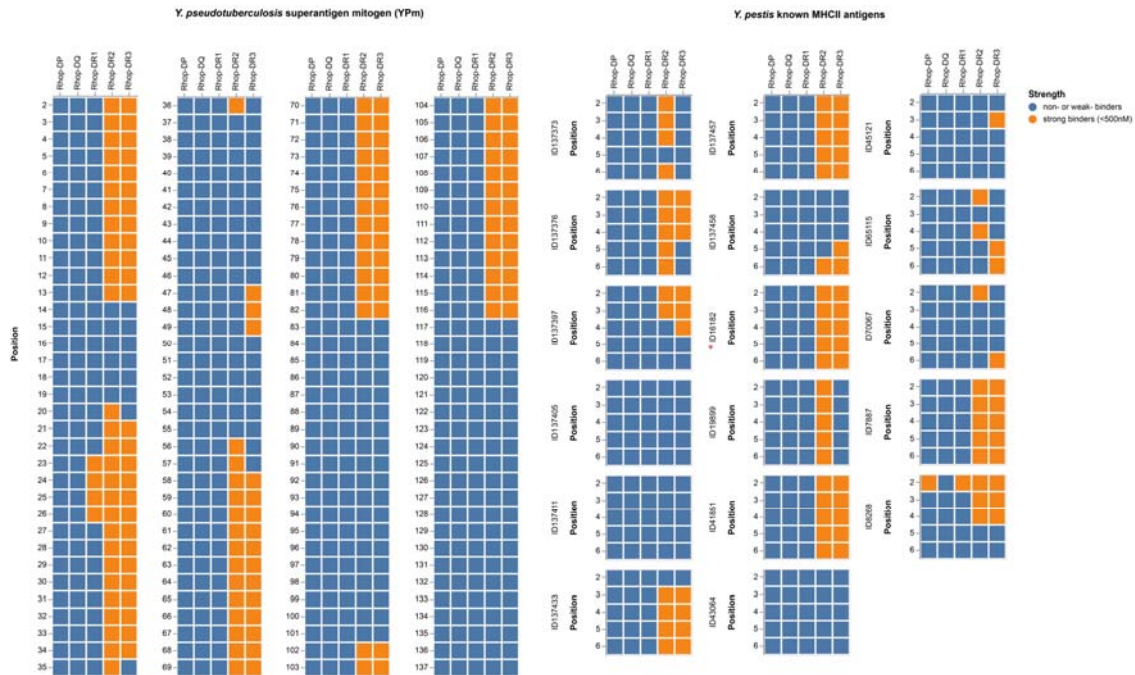

418

419 **Figure 7 Affinity predictions of great gerbil MHCII molecules**

420 **FIG. 7** Affinity predictions of great gerbil MHC class II molecules represented as a heatmap.

421 For the known *Y. pestis* antigens all are from the F1 capsule precursor except ID16182 (red asterisk)

422 which is from the V antigen. Strong binders are defined as <500 nM and depicted in orange, while

423 weak or non-binders are represented in blue.

424

## 425 Discussion

426 Here we present a highly contiguous *de novo* genome assembly of the great gerbil covering

427 over 96 % of the estimated genome size and almost 88 % of the gene space, which is

428 equivalent to the genic completeness reported in the recently published and close relative

429 sand rat genome [48] (Additional file 2: Table S7). By comparative genomic analyses where

430 we include genome data from its close relatives within the Gerbillinae, we provide novel

431 insight into the innate and adaptive immunological genomic landscape of this key plague

432 host species.



433

#### 434 **The *TLR* repertoire in the great gerbil and Gerbillinae**

435 *TLRs* are essential components of PRRs and the innate immune system as they alert the  
436 adaptive immune system of the presence of invading pathogens [49]. The detailed  
437 characterization of *TLRs* did not uncover any species-specific features for the great gerbil.  
438 However, a shared *TLR* gene repertoire for the Gerbillinae lineage (i.e. the great gerbil, sand  
439 rat and Mongolian gerbil), with gene losses of *TLR8*, *TLR10* and all members of the *TLR11*-  
440 subfamily was revealed. This finding could indicate quite similar selective pressures on these  
441 species, at least in regard to their function of *TLRs*, all being desert dwelling, burrowing  
442 rodents living in arid or semi-arid ecosystems and being capable of carrying plague. Thus, it  
443 is possible that the members of this clade have reduced the *TLR* repertoire in a cost-benefit  
444 response to environmental constraints or due to altered repertoire of pathogen exposure  
445 [50]. These results are in line with the fairly conserved *TLR* gene repertoire reported within  
446 the vertebrate lineage [51], although the repertoire of *TLR* genes present within vertebrate  
447 groups can show major differences [51-53], presumably in response to presence or lack of  
448 certain pathogen or environmental pressures [54,55]. Outside of Gerbillinae, the presence of  
449 *TLR11*-subfamily appears to be universal in Rodentia, however functionally lost from the  
450 human repertoire [51,53]. The *TLR11*-subfamily recognizes parasites and bacteria through  
451 profilin, flagellin and 23S ribosomal RNA [56,57] and it is possible that cross-recognition of  
452 these patterns by other *TLR* members or other PRRs might have made the *TLR11*-subfamily  
453 redundant in Gerbillinae and humans [50]. The varying degree of point mutations,  
454 frameshift-causing indels and in some cases almost complete elimination of sequence in  
455 *TLR8*, *TLR10* and *TLR11-13* in Gerbillinae suggest successive losses of these receptors, where  
456 a shared pseudogenization of *TLR12-13* across all species investigated were recorded. For

457 *TLR11* however, the pseudogenization seems to have occurred in multiple steps, i.e. with a  
458 more recent event in the great gerbil where a near full-length sequence was identified  
459 compared to the shorter fragments identified for Mongolian gerbil and sand rat (Additional  
460 file 1: Figure S2C). Furthermore, the high degree of shared disruptive mutations among all  
461 three species of Gerbillinae indicates that the initiation of pseudogenization predates the  
462 speciation estimated to have occurred about 5.5 Mya [58].

463

464 In the context of plague susceptibility, the branch specific diversifying selection reported  
465 here for *TLR7* and *TLR9* in Gerbillinae is intriguing, as both receptors have been implicated to  
466 affect the outcome of plague infection in mice and humans [59-61]. For instance, the study  
467 by Dhariwala et al. (2017) showed, in a murine model, that TLR7 recognizes intracellular *Y.*  
468 *pestis* and is important for defense against disease in the lungs but was detrimental to  
469 septicemic plague [59]. Moreover, recognition of *Y. pestis* by TLR9 was also demonstrated by  
470 Saikh et al. (2009) in human monocytes [61]. All but one of the residues under site specific  
471 selection seen in *TLR7* and *TLR9* were located in the ectodomain, which may suggest  
472 possible alterations in ligand recognition driven by selection pressure from *Y. pestis* or other  
473 shared pathogens. Stimulation of *TLR7* and *TLR9* have also been reported to regulate antigen  
474 presentation by *MHCII* in murine macrophages [62]. These data could therefore indicate a  
475 possible connection of the selection in *TLR7* and *TLR9* with the great gerbil duplication in  
476 *MHCII*. For *TLR4*, the selection tests and sequence alignment analysis did not reveal any  
477 branch-specific selection for great gerbil nor Gerbillinae, whereas we did detect signs of site-  
478 specific selection in the ectodomain that occasionally was driven by great gerbil or  
479 Gerbillinae substitutions. TLR4 is the prototypical PRR for detection of lipopolysaccharides  
480 (LPS) found in the outer membrane of gram-negative bacteria like *Y. pestis*. As part of the

481 arms race, however, it is well known that gram-negative bacteria, including *Y. pestis*, alter  
482 the conformation of their LPS in order to avoid recognition and strong stimulation of the  
483 TLR4-MD2-CD14 receptor complex [63-65]. Despite this, in mice at least, some inflammatory  
484 signaling still occurs through this receptor complex but require particular residues in TLR4  
485 not found to be conserved in the Gerbillinae lineage. Whether other mutations in TLR4 in  
486 Gerbillinae have a similar functionality as the residues that allow mice to respond to *Y. pestis*  
487 LPS is not known. However, if such functionality is missing in Gerbillinae, the loss of  
488 responsiveness to the hypoacetylated LPS [19] could perhaps defer some protection from  
489 pathologies caused by excessive initiation of inflammatory responses [66], and thus TLR4 is  
490 not likely directly involved in the resistance of plague in great gerbils.

491

492 Cumulatively, our investigations of the great gerbil innate immune system, focusing on the  
493 *TLR* gene repertoire, reveal shared gene losses within *TLR* gene families for the Gerbillinae  
494 lineage, all being desert dwelling species capable of carrying plague. The evolutionary  
495 analyses conducted did not uncover any great gerbil-specific features that could explain  
496 their resistance to *Y. pestis*, indicating that other PRRs (not investigated here) could be more  
497 directly involved during the innate immune response to plague infection in the great gerbil  
498 [36].

499

## 500 **Great gerbil MHC repertoires**

501 MHC I and II proteins are crucial links between the innate and adaptive immune system  
502 continuously presenting peptides on the cell surface for recognition by CD8+ and CD4+ T  
503 cells respectively, and MHC genes readily undergo duplications, deletions and  
504 pseudogenization [67]. For *MHCI*, the discovery of 16 copies in great gerbil is in somewhat

505 agreement with what has earlier been reported in rodents, where the *MHCI* region is found  
506 to have undergone extensive duplication followed by sub- and neofunctionalization with  
507 several genes involved in non-immune functions [68,69]. However, it should be noted that  
508 our copy number estimation is most likely an underestimation, due to the assembly collapse  
509 in almost all *MHCI* containing regions identified. Furthermore, not all copies could be  
510 confidently placed in the gene maps as some scaffolds lacked colocalizing framework genes.  
511 These two factors are the probable reason why the great gerbil appears to be lacking some  
512 *MHCI* genes compared to mouse and rat.

513

514 For *MHCII* we discovered a gerbil-specific duplication that is not present in other closely  
515 related plague hosts or in other rodents investigated. The phylogeny established the  
516 duplication's (*Rhop-DRB3*) relationship to *Rhop-DRB1* and other mammalian  $\beta 1$  genes and  
517 reflects the orthology of mammalian *MHCII* genes [70]. The localization of *Rhop-DRB3*  
518 outside of the generally conserved framework of the *MHCII* region and not in tandem with  
519 the other  $\beta$  genes of the *DR* locus is unusual and is not generally seen for eutherian  
520 mammals. For instance, major duplication events with altered organization and orientation  
521 of *DR* and *DQ* genes has been reported for the *MHCII* region in horse (*Equus caballus*),  
522 however all genes are found within the framework genes [71]. Duplications tend to disperse  
523 in the genome as they age [72], thus the reversed orientation and translocation of the great  
524 gerbil copy might indicate that the duplication event is ancient occurring sometime after the  
525 species split approximately 5 Mya. However, it must also be noted that there are several  
526 assembly gaps located between *Rhop-DRB1* and *Rhop-DRB3* resulting in the possibility of the  
527 translocation being a result of an assembly error.

528

529 Predictions of the affinity of the  $\beta 1$ ,  $\beta 2$  and  $\beta 3$  MHCII molecules to *Y. pestis* and *Y.*  
530 *pseudotuberculosis* antigens matched the reported high affinity of rodent  $\beta 2$  molecules for  
531 *Yersinia* epitopes [42]. Rhop-DRB3 had an equally high affinity and largely identical affinity-  
532 profile as Rhop-DRB2. A high affinity for *Y. pestis* epitopes is important in the immune  
533 response against plague, as the initiation of a T cell response is more efficient and requires  
534 fewer APCs and T cells when high-affinity peptides are presented by MHCII molecules [73].  
535 In the early stages of an infection where presence of antigen is low, there will be fewer  
536 MHCII molecules presenting peptides and affinity for those peptides is paramount to fast  
537 initiation of the immune response against the pathogen. Individuals presenting MHCII  
538 molecules with high affinity for pathogen epitopes are able to raise an immune defense  
539 more quickly and have a better chance of fighting off the rapidly progressing infection than  
540 individuals that are fractionally slower. This fractional advantage could mean the difference  
541 between death or survival.

542

543 We find comparable expression levels for *Rhop-DRB1* and *Rhop-DRB3* but no detectable  
544 expression of *Rhop-DRB2*. These similarities and differences are likely explained by the  
545 variations discovered in the proximal promoter of the genes. Integrity of the conserved  
546 motifs and the spacing between them is necessary for assembly of the enhanceosome  
547 complex of transcription factors and subsequent binding of Class II Major Histocompatibility  
548 Complex transactivator (*CIITA*), and is essential for efficient expression of *MHCII* genes. The  
549 conservation of the proximal promoter of *Rhop-DRB3* along with the overall sequence  
550 similarity with other  $\beta 1$  genes are indicative of a similar expression pattern. In contrast, the  
551 deletion in the X box of *Rhop-DRB2* reducing the motif to half the size will likely affect the  
552 ability of the transcription factors to bind and could explain the lack of expression. Similar

553 disruptions in the  $\beta 2$  genes of the other Gerbillinae were found along with a major deletion  
554 further downstream in all  $\beta 2$  genes that perhaps explains the previously reported low and  
555 unusual pattern of transcription for rodent  $\beta 2$  genes [42,44]. The equal affinity profile but  
556 different expression levels of *Rhop-DRB2* and *Rhop-DRB3* could mean that *Rhop-DRB3* has  
557 taken over the immune function lost by the lack of expression of *Rhop-DRB2*. The selective  
558 pressure might have come from *Yersinia* or pathogens similar to *Yersiniae*. A nonclassical  
559 function of MHCII molecules have also been reported where intracellular MHCII interacted  
560 with components of the TLR signaling pathway in a way that suggested MHCII molecules are  
561 required for full activation of the TLR-triggered innate immune response [74]. Moreover, in  
562 vertebrates the *MHCII DRB* genes are identified as highly polymorphic and specific allele  
563 variants have frequently been linked to increased susceptibility to diseases in humans [75].  
564 Intriguingly, in a recent study by Cobble et al. (2016) it was suggested that allelic variation of  
565 the *DRB1* locus could be linked to plague survival in Gunnison's prairie dog colonies [40].  
566 Thus, investigating how the genetic variation of the *DRB1* and *DRB3* loci in great gerbil  
567 manifests at the population level and the affinity of these allelic variants to *Yersiniae*  
568 epitopes, would be the next step to further our understanding of the plague resistant key  
569 host species in Central Asia.

570

571 From the analyses conducted on the genomic landscape of the adaptive immune system of  
572 the great gerbil, i.e. *MHCI* and *MHCII* more specifically, the most interesting reporting is the  
573 duplication of an *MHCII* gene. *In silico* analyses of *Rhop-DRB3* indicate a high predicted  
574 affinity for *Y. pestis* epitopes, which may result in faster initiation of the adaptive immune  
575 system in great gerbils when exposed to the pathogen, and thus could explain the high  
576 degree of plague resistance in this species.

577

## 578 **Conclusion**

579 Plague has historically had a vast impact on human society through major pandemics,  
580 however it mainly circulates in rodent communities. A key issue is to understand host-  
581 pathogen interactions in these rodent hosts. From the pathogen-perspective, research has  
582 studied how *Y. pestis* has evolved to evade both detection and destruction by the  
583 mammalian immune system to establish infection. In this study, we have demonstrated the  
584 power of using whole genome sequencing of a wild plague reservoir species to gain new  
585 insight into the genomic landscape of its resistance by immuno-comparative analyses with  
586 closely related plague hosts and other mammals. We reveal the duplication of an MHCII  
587 gene in great gerbils with a computed peptide binding profile that putatively would cause a  
588 faster initiation of the adaptive immune system when exposed to *Yersinia* epitopes. We  
589 also find signs of positive selection in *TLR7* and *TLR9*, which have been shown to regulate  
590 antigen presentation and impact the outcome of a plague infection. Investigations into how  
591 the genetic variation of the MHCII locus manifests at the population level are necessary to  
592 further understand the role of the gene duplication in the resistance of plague in great  
593 gerbils. Comprehending the genetic basis for plague resistance is crucial to understand the  
594 persistence of plague in large regions of the world and the great gerbil *de novo* genome  
595 assembly is a valuable anchor for such work, as well as a resource for future comparative  
596 work in host-pathogen interactions, evolution (of resistance) and adaptation.

597

## 598 **Methods**

### 599 **Sampling and sequencing**

600 A male great gerbil weighing 180g was captured in the Midong District outside Urumqi in  
601 Xinjiang Province, China in October 2013. The animal was humanely euthanized and tissue  
602 samples of liver were conserved in ethanol prior to DNA extraction. Blood samples from the  
603 individual were screened for F1 ‘capsular’ antigen (Caf1) and anti-F1 as described in [30,76]  
604 to confirm plague negative status. The DNA used in the library construction was extracted  
605 from liver tissue using Genra Puregene Tissue Kit (Qiagen Inc. USA). Use of great gerbil  
606 tissue was approved by the Committee for Animal Welfares of Xinjiang CDC, China.

607

608 The sequence strategy was tailored towards the ALLPATHS-LG assembly software (Broad  
609 Institute, Cambridge, MA) following their recommendations for platform choice and  
610 fragment size resulting in the combination of one short paired-end (PE) library with an  
611 average insert size of 220 bp (150 bp read length) and two mate-pair (MP) libraries of 3 kbp  
612 and 10 kbp insert size (100 bp read length). See Additional file 2: Table S1 for a list of  
613 libraries and sequence yields. Sequencing for the *de novo* assembly of the great gerbil  
614 reference genome was performed on the Illumina platform using HiSeq2500 instruments at  
615 the Norwegian Sequencing Centre at the University of Oslo for the PE library  
616 (<https://www.sequencing.uio.no>) and using HiSeq2000 instruments at Génome Québec at  
617 McGill University for the MP libraries (<http://gqinnovationcenter.com/index.aspx?l=e>).

618

### 619 **Genome assembly and Maker annotation**

620 The Illumina sequences were quality checked using FastQC v0.11.2 and SGA-preqc  
621 (downloaded 25<sup>th</sup> June 2014) with default parameters. Both MP libraries were trimmed for  
622 adapter sequences using cutadapt v1.5 with option -b and a list of adapters used in MP  
623 library prep [77] and the trimmed reads were used alongside the PE short read as input for



624 ALLPATHS-LG v48639 generating a *de novo* assembly. This combination of short-read  
625 sequencing technology combined with the ALLPATHS-LG assembly algorithm is documented  
626 to perform well in birds and mammals [78-80]. File preparations were conducted according  
627 to manufacturer's recommendation and the option TARGETS=submission was added to the  
628 run to obtain a submission prepared assembly version.

629

630 Assembly completeness was assessed by analysing the extent of conserved eukaryotic genes  
631 present using CEGMA v2.4.010312 and BUSCO v1.1.b [81-83]. Gene mining for the highly  
632 conserved Homeobox (*HOX*) genes was also conducted as an additional assessment of  
633 assembly completeness (see Additional file 1: Note S1 and Figure S10).

634 All reads were mapped back to the assembly using BWA-MEM v 0.7.5a and the resulting  
635 bam files were used alongside the assembly in REAPR v 1.0.17 to evaluate potential  
636 scaffolding errors as well as in Blobology to inspect the assembly for possible contaminants,  
637 creating Taxon-Annotated-GC-Coverage (TAGC) plots of the results from BLAST searches of  
638 the NCBI database [84].

639

640 The genome assembly was annotated using the MAKER2 pipeline v2.31 run iteratively in a  
641 two-pass fashion (as described in [https://github.com/sujaikumar/assemblage/blob/master/](https://github.com/sujaikumar/assemblage/blob/master/README-annotation.md)  
642 [README-annotation.md](https://github.com/sujaikumar/assemblage/blob/master/README-annotation.md)) [85]. Multiple steps are required prior to the first pass though  
643 MAKER2 and include creating a repeat library for repeat masking and training three different  
644 ab initio gene predictors. Firstly, construction of the repeat library was conducted as  
645 described in [86]. In brief, a *de novo* repeat library was created for the assembly by running  
646 RepeatModeler v1.0.8 with default parameters, and sequences matching known proteins of  
647 repetitive nature were removed from the repeat library through BLASTx against the UniProt

648 database. Next, GeneMark-ES v2.3e was trained on the genome assembly using default  
649 parameters with the exception of reducing the `-min-contig` parameter to 10.000 [87]. SNAP  
650 v20131129 and AUGUSTUS v3.0.2 was trained on the genes found by CEGMA and BUSCO,  
651 respectively. The generated gene predictors and the repeat library were used in the first  
652 pass alongside proteins from UniProt/SwissProt (downloaded 16<sup>th</sup> February 2016) as protein  
653 homology evidence and *Mus musculus* cDNA as alternative EST evidence (GRCm38  
654 downloaded from Ensembl). For the second pass, SNAP and AUGUSTUS were retrained with  
655 the generated MAKER2 predictions and otherwise performed with the same setup. The  
656 resulting gene predictions had domain annotations and putative functions added using  
657 InterProScan v5.4.47 and BLASTp against the UniProt database with evaluate 1e-5 (same  
658 methodology as [86,88]). Finally, the output was filtered using the MAKER2 default filtering  
659 approach only retaining predictions with AED <1.

660

## 661 **Genome mining and gene alignments**

662 We searched for *TLR* genes, associated receptors and adaptor molecules as well as genes of  
663 the MHC region (complete list of genes can be found in Additional file 2: Table S4) collected  
664 from UniProt and Ensembl. Throughout, we performed tBLASTn searches, manual assembly  
665 exon by exon in MEGA7 and verified annotations through reciprocal BLASTx against the NCBI  
666 database and phylogenetic analysis including orthologues from human (*Homo sapiens*),  
667 mouse (*Mus musculus*), rat (*Rattus norvegicus*) and all three members of the *Gerbillinae*  
668 subfamily. For details on the phylogenetic analyses we refer to descriptions in sections  
669 below. In the *TLR* analyses Algerian mouse (*M. spretus*), Ryukyu mouse (*M. caroli*), Chinese  
670 hamster (*Cricetulus griseus*) and Chinese tree shrew (*Tupaia belangeri chinensis*) were also  
671 included.

672

673 Sand rat and Mongolian gerbil genome assemblies were downloaded from NCBI (September  
674 12<sup>th</sup> 2017). The genome assemblies of the great gerbil, sand rat and Mongolian gerbil were  
675 made into searchable databases for gene mining using the makeblastdb command of the  
676 blast+ v2.6.0 program. Local tBLASTn searches, using protein sequences of mouse and  
677 occasionally rat, human and Mongolian gerbil as queries, were executed with default  
678 parameters including an e-value cut-off of 1e+1. The low e-value was utilized to capture  
679 more divergent sequence homologs. Hits were extracted from assemblies using bedtools  
680 v2.26.0 and aligned with orthologs in MEGA v7.0.26 using MUSCLE with default parameters.  
681 In cases where annotations for some of the *TLRs* for a species were missing in Ensembl and  
682 could not be located in either the NCBI nucleotide database or in UniProt, the Ensembl  
683 BLAST Tool (tBLASTn) was used with default parameters to find the genomic region of  
684 interest using queries from mouse.

685

### 686 **Synteny analyses of MHC regions**

687 A combination of the Ensembl genome browser v92 and comparisons presented in [89] and  
688 tBLASTn searches, as described above, were used in synteny analyses of the MHC I and II  
689 regions of human, rat and mouse with great gerbil. Synteny of MHC II genes of sand rat and  
690 Mongolian gerbil were also investigated, however for simplicity and visualization purposes  
691 not included in the figure (Fig. 3).

692

### 693 **Alignment and phylogenetic reconstruction of TLR and MHC**

694 Sequences were aligned with MAFFT [90] using default parameters: for both nucleotides and  
695 amino acid alignments the E-INS-i model was utilized. The resulting alignments were edited  
696 manually using Mesquite v3.4 [91]. See Additional file 2: Tables S8-10 for accession numbers.

697

698 Ambiguously aligned characters were removed from each alignment using Gblocks [92] with  
699 the least stringent parameters for codons and proteins.

700 Maximum likelihood (ML) phylogenetic analyses were performed using the “AUTO”  
701 parameter in RAxML v8.0.26 [93] to establish the evolutionary model with the best fit. The  
702 general time reversible (GTR) model was the preferred model for the nucleotide alignments,  
703 and JTT for the amino acid alignments. The topology with the highest likelihood score of 100  
704 heuristic searches was chosen. Bootstrap values were calculated from 500 pseudoreplicates.  
705 Taxa with unstable phylogenetic affinities were pre-filtered using RogueNaRok [94] based on  
706 evaluation of a 50 % majority rule (MR) consensus tree, in addition to exclusion of taxa  
707 with >50 % gaps in the alignment.

708

709 Bayesian inference (BI) was performed using a modified version of MrBayes v3.2 [95]  
710 (<https://github.com/astanabe/mrbayes5d>). The dataset was executed under a separate  
711 gamma distribution. Two independent runs, each with three heated and one cold Markov  
712 Chain Monte Carlo (MCMC) chain, were started from a random starting tree. The MCMC  
713 chains were run for 20,000,000 generations with trees sampled every 1,000<sup>th</sup> generation.  
714 The posterior probabilities and mean marginal likelihood values of the trees were calculated  
715 after the burn-in phase (25 %), which was determined from the marginal likelihood scores of  
716 the initially sampled trees. The average split frequencies of the two runs were < 0.01,  
717 indicating the convergence of the MCMC chains.

718

## 719 **Selection analyses**

720 All full-length *TLRs* located in the genomes of great gerbil, sand rat and Mongolian gerbil  
721 along with other mammalian *TLRs* (Additional file 2: Table S8) were analysed in both classic  
722 Datamonkey and Datamonkey 2.0 ([datamonkey.org](http://datamonkey.org)) testing for signs of selection with a  
723 phylogeny guided approach [96,97]. For each *TLR* gene alignment a model test was first run  
724 prior to the selection test and the proposed best model was used in the analyses. The mixed  
725 effects model of evolution (MEME) and adaptive branch-site random effects model (aBSREL)  
726 were used to test for site based and branch level episodic selection, respectively [98-100].  
727 aBSREL was iterated three times per gene alignment, initially running an exploratory analysis  
728 where all branches were tested for positive selection and subsequently in a hypothesis mode  
729 by which first the Gerbillinae clade and secondly the great gerbil was selected as  
730 “foreground” branches to test for positive selection. All *TLR* alignments are available in the  
731 Github repository ([https://github.com/uio-cels/Nilsson\\_innate\\_and\\_adaptive](https://github.com/uio-cels/Nilsson_innate_and_adaptive)).

732

## 733 **TLR protein structure prediction**

734 Translated full-length great gerbil *TLR* sequences were submitted to the Phyre2 structure  
735 prediction server for modelling [101]. All sequences were modelled against human TLR5  
736 (c3j0aA) and the resulting structures were colored for visualization purposes using Jmol  
737 (Jmol: an open-source Java viewer for chemical structures in 3D.  
738 <http://www.jmol.org/>). Colors were used to differentiate between helices, sheets and loops  
739 as well as the transmembrane domain, linker and TIR domain. Sites found in the MEME  
740 selection analysis were indicated in pink and further highlighted with arrows (Additional file

741 1: Figures S7-9). All great gerbil PDB files are available in the GitHub repository  
742 ([https://github.com/uio-cels/Nilsson\\_innate\\_and\\_adaptive](https://github.com/uio-cels/Nilsson_innate_and_adaptive)).

743

744 As TLR4 is the prototypical PRR for lipopolysaccharide (LPS) which are found in all gram-  
745 negative bacteria including *Y. pestis*, we subjected the sequence alignment to additional  
746 investigation of certain residues indicated in the literature to have an impact on signaling  
747 [19]. These were the residues at position 367 and 434, which in mouse are both basic and  
748 positively charged, enabling the mouse TLR4 to maintain some signaling even for  
749 hypoacetylated LPS [19]. Hypoacetylated LPS is a common strategy for gram-negative  
750 bacteria to avoid recognition and strong stimulation of the TLR4-MD2-CD14 receptor  
751 complex [63-65].

752

### 753 **MHCII promoter investigation**

754 The region 400 bp upstream of human HLA-DRB, mouse H2-Eb and rat RT-Db genes were  
755 retrieved from Ensembl (GRCh38.p12, GRCm38.p6 and Rnor\_6.0). Similarly, the region 400  
756 bp upstream of the start codon of DRB genes in the three Gerbillinae were retrieved using  
757 bedtools v2.26.0. Putative promoter S-X-Y motifs, as presented for mouse in [102], were  
758 manually identified for each gene in MEGA7 and all sequences were subsequently aligned  
759 using MUSCLE with default parameters [102].

760

### 761 **Peptide binding affinity**

762 The functionality of MHCII genes is defined by the degree of expression of the MHC genes  
763 themselves, and the proteins ability to bind disease-specific peptides to present to the  
764 immune system. The ability of an MHCII protein to bind particular peptides can with some

765 degree of confidence be estimated by MHC prediction algorithms, even for unknown MHCII  
766 molecules, as long as the alpha and beta-chain protein sequences are available [47]. We  
767 here use the NetMHCIIpan predictor v3.2 [47] to estimate the peptide binding affinities of  
768 the novel Rhop-DRB3 MHCII molecule and compare it to various other MHCII molecules from  
769 great gerbil, mouse, sand rat and Mongolian gerbil. The program was run with default  
770 settings and provided with the relevant protein sequences of alpha and beta chains. We  
771 compared the predicted binding affinity of these MHCII molecules for 17 known *Y. pestis*  
772 epitopes derived from positive ligand assays of *Y. pestis* (<https://www.iedb.org/>). Specifically,  
773 we tested against 16 ligands derived from the F1 capsule antigen of *Y. pestis*, and 1 ligand  
774 from the virulence-associated Low calcium V antigen (LcrV) of *Y. pestis*. In addition, we  
775 compared the binding affinity of these MHCII molecules against the superantigen *Y.*  
776 *pseudotuberculosis* derived mitogen precursor (YPm) [42]. The threshold for binders was set  
777 to <500nM [47].

778

### 779 **RNA sampling and sequencing**

780 Two additional great gerbils were captured in the Midong District outside Urumqi in Xinjiang  
781 Province, China, in September 2014. The animals were held in captivity for 35 days before  
782 being humanely euthanized and liver tissue samples were conserved in RNA $later^{\text{TM}}$  at -20 °C  
783 prior to RNA extraction. RNA was extracted using standard chloroform procedure [103].  
784 Library prep and sequencing were conducted at the Beijing Genomics Institute (BGI,  
785 <https://www.bgi.com/us/sequencing-services/dna-sequencing/>) using Illumina TruSeq RNA  
786 Sample Prep Kit and PE sequencing on the HiSeq4000 instrument (150 bp read length).

787 The reads were trimmed using trimmomatic v0.36 and mapped to the genome assembly  
788 using hisat2 v2.0.5 with default parameters. A raw count matrix was created by using htseq  
789 v0.7.2 with default parameters to extract the raw counts from the mapped files.

790

## 791 **Acknowledgements**

792 All computational work was performed on the Abel Supercomputing Cluster (Norwegian  
793 metacenter for High Performance Computing (NOTUR) and the University of Oslo) operated  
794 by the Research Computing Services group at USIT, the University of Oslo IT- department  
795 and the Cod nodes of CEES. Sequencing library creation and high throughput sequencing was  
796 carried out at the Norwegian Sequencing Centre (NSC), University of Oslo, Norway, and  
797 McGill University and Genome Quebec Innovation Centre, Canada.

798 We would like to thank Morten Skage for assistance in sequence library construction and Ole  
799 K. Tørresen, Srinidhi Varadharajan, Tore O. Elgvin and Cassandra N. Trier for helpful advice  
800 and support during assembly and annotations steps of the genome, Helle T. Baalsrud for  
801 advice during genome mining and Tone F. Gregers for helpful discussions regarding MHCII.  
802 For early access to the sand rat genome assembly we thank John F. Mulley.

803

## 804 **Funding**

805 This project was funded by University of Oslo Molecular Life Science (MLS, allocation  
806 #152950), the Research Council of Norway (RCN grant #179569), the European Research  
807 Council (ERC-2012-AdG No. 324249 -MedPlag), the National Natural Science Foundation of  
808 China (No. 31430006) and National Key Research & Development Program of China  
809 (2016YFC1200100).

810



## 811 **Availability of data and materials**

812 The genome assembly has been deposited at DDBJ/ENA/GenBank  
813 under the accession REGO00000000. The version described in this paper  
814 is version REGO01000000.

815 The genome assembly and annotation are also available from FigShare:

816 In the following GitHub repository are files of immune gene alignments, PDB files and more:

817 [https://github.com/uio-cels/Nilsson\\_innate\\_and\\_adaptive](https://github.com/uio-cels/Nilsson_innate_and_adaptive)

818

## 819 **Authors' contributions**

820 PN created the genome assembly and annotated it, performed all BLAST-based, *TLR* based  
821 and promoter analysis and wrote the first draft of the manuscript. MHS conducted the  
822 protein model analyses of TLRs and assisted in the BLAST-based and *TLR* analyses. BVS  
823 performed the MHCII affinity analyses. RJSO performed phylogenetic analysis of *TLR*, *MHCI*  
824 and *MHCII* genes. YZ, sampled, acclimatised and tested individual great gerbil for plague. RL,  
825 YC and YS extracted DNA and RNA for sequencing. PN, WRE, BVS, SJ and KSJ designed the  
826 sequencing strategy. WRE, BVS, SJ, KSJ, NCS and RY oversaw the project. All authors read  
827 and approved the final manuscript.

828

## 829 **Ethics approval**

830 Use of great gerbil tissue was approved by the Committee for Animal Welfares of Xinjiang  
831 Centre for Disease Control and Prevention, China. Sampling was performed prior to Chinas  
832 signature of the Nagoya Protocol (date of accession September 6<sup>th</sup> 2016). The sampled  
833 species have a “least concern” status in the IUCN Red List of Threatened Species.

834

835 **Consent for publication**

836 Not applicable.

837

838 **Competing interests**

839 The authors declare that they have no competing interests.

840

841 **Additional files**

842 Additional file 1: Additional figures and one Note detailing the HOX gene mining (DOCX

843 19.2Mb)

844 Additional file 2: Additional tables (DOCX 66Kb)

845 Additional file 3: Peptide binding affinity predictions for all MHCII molecules run in

846 NetMHCIIpan predictor v3.2 (XLSX)

847

848 **References**

849 1. Anisimov AP, Lindler LE, Pier GB. Intraspecific Diversity of *Yersinia pestis*. *Clinical*

850 *Microbiology Reviews*. 2004;17:434–64.

851 2. Addink EA, De Jong SM, Davis SA, Dubyanskiy V, Burdelov LA, Leirs H. The use of high-

852 resolution remote sensing for plague surveillance in Kazakhstan. *Remote Sensing of*

853 *Environment*. Elsevier; 2010;114:674–81.

854 3. Nowak RM. *Walker's Mammals of the World*. JHU Press; 1999.

- 855 4. Zhang Z, Zhong W, Fan N. Rodent problems and management in the grasslands of China.  
856 In: Singleton GR, Hinds LA, Krebs CJ, Spratt DM, editors. Rats, mice and people: rodent  
857 biology and management. researchgate.net; 2003. pp. 316–9.
- 858 5. Gage KL, Kosoy MY. Natural history of plague: perspectives from more than a century of  
859 research. *Annu. Rev. Entomol.* 2005;50:505–28.
- 860 6. Yang R, Anisimov A. *Yersinia pestis*: Retrospective and Perspective. Springer; 2016.
- 861 7. Stenseth NC, Atshabar BB, Begon M, Belmain SR, Bertherat E, Carniel E, et al. Plague: past,  
862 present, and future. *PLoS Med.* Public Library of Science; 2008;5:e3.
- 863 8. Bramanti B, Stenseth NC, Walløe L, Lei X. Plague: A Disease Which Changed the Path of  
864 Human Civilization. In: Yang R, Anisimov A, editors. *Yersinia pestis*: Retrospective and  
865 Perspective. Dordrecht: Springer; 2016. pp. 1–26.
- 866 9. Hinnebusch BJ, Jarrett CO, Bland DM. “Fleaing” the Plague: Adaptations of *Yersinia pestis*  
867 to Its Insect Vector That Lead to Transmission. *Annu. Rev. Microbiol.* Annual Reviews;  
868 2017;71:215–32.
- 869 10. Samia NI, Kausrud KL, Heesterbeek H, Ageyev V, Begon M, Chan K-S, et al. Dynamics of  
870 the plague–wildlife–human system in Central Asia are controlled by two epidemiological  
871 thresholds. *Proceedings of the National Academy of Sciences.* National Academy of Sciences;  
872 2011;108:14527–32.
- 873 11. Nguyen VK, Parra-Rojas C, Hernandez-Vargas EA. The 2017 plague outbreak in  
874 Madagascar: Data descriptions and epidemic modelling. *Epidemics.* 2018.

- 875 12. Boisier P, Rahalison L, Rasolomaharo M, Ratsitorahina M, Mahafaly M, Razafimahefa M,  
876 et al. Epidemiologic Features of Four Successive Annual Outbreaks of Bubonic Plague in  
877 Mahajanga, Madagascar. *Emerging Infect. Dis. Centers for Disease Control and Prevention*;  
878 2002;8:311–6.
- 879 13. Migliani R, Chanteau S, Rahalison L, Ratsitorahina M, Boutin JP, Ratsifasoamanana L, et al.  
880 Epidemiological trends for human plague in Madagascar during the second half of the 20th  
881 century: a survey of 20 900 notified cases. *Tropical Medicine & International Health*.  
882 Wiley/Blackwell (10.1111); 2006;11:1228–37.
- 883 14. Rahelinirina S, Rajerison M, Telfer S, Savin C, Carniel E, Duplantier J-M. The Asian house  
884 shrew *Suncus murinus* as a reservoir and source of human outbreaks of plague in  
885 Madagascar. Vinetz JM, editor. *PLoS Negl Trop Dis. Public Library of Science*;  
886 2017;11:e0006072.
- 887 15. Link VB. Plague on the high seas. *Public Health Rep.* 1951;66:1466–72.
- 888 16. Sebbane F, Jarrett CO, Gardner D, Long D, Hinnebusch BJ. Role of the *Yersinia pestis*  
889 plasminogen activator in the incidence of distinct septicemic and bubonic forms of flea-  
890 borne plague. *Proceedings of the National Academy of Sciences. National Acad Sciences*;  
891 2006;103:5526–30.
- 892 17. Neefjes J, Jongsma MLM, Paul P, Bakke O. Towards a systems understanding of MHC  
893 class I and MHC class II antigen presentation. *Nat Rev Immunol. Nature Publishing Group*;  
894 2011;11:823–36.
- 895 18. Murphy K, Weaver C. *Janeway's Immunobiology*, 9th edition. Garland Science; 2016.

- 896 19. Sironi M, Cagliani R, Forni D, Clerici M. Evolutionary insights into host-pathogen  
897 interactions from mammalian sequence data. Nature Publishing Group. Nature Publishing  
898 Group; 2015;16:224–36.
- 899 20. Brockhurst MA, Chapman T, King KC, Mank JE, Paterson S, Hurst GDD. Running with the  
900 Red Queen: the role of biotic conflicts in evolution. Proc. Biol. Sci. 2014;281:20141382–2.
- 901 21. Dyer MD, Neff C, Dufford M, Rivera CG, Shattuck D, Bassaganya-Riera J, et al. The  
902 human-bacterial pathogen protein interaction networks of *Bacillus anthracis*, *Francisella*  
903 *tularensis*, and *Yersinia pestis*. Rénia L, editor. PLoS ONE. Public Library of Science;  
904 2010;5:e12089.
- 905 22. Chung LK, Bliska JB. *Yersinia* versus host immunity: how a pathogen evades or triggers a  
906 protective response. Current Opinion in Microbiology. 2016;29:56–62.
- 907 23. Shannon JG, Hasenkrug AM, Dorward DW, Nair V, Carmody AB, Hinnebusch BJ. *Yersinia*  
908 *pestis* Subverts the Dermal Neutrophil Response in a Mouse Model of Bubonic Plague. mBio.  
909 2013;4:e00170–13–e00170–13.
- 910 24. Shannon JG, Bosio CF, Hinnebusch BJ. Dermal Neutrophil, Macrophage and Dendritic Cell  
911 Responses to *Yersinia pestis* Transmitted by Fleas. Monack DM, editor. PLoS Pathog.  
912 2015;11:e1004734.
- 913 25. Gonzalez RJ, Lane MC, Wagner NJ, Weening EH, Miller VL. Dissemination of a Highly  
914 Virulent Pathogen: Tracking The Early Events That Define Infection. Valdivia RH, editor. PLoS  
915 Pathog. 2015;11:e1004587.

- 916 26. Nham T, Filali S, Danne C, Derbise A, Carniel E. Imaging of bubonic plague dynamics by in  
917 vivo tracking of bioluminescent *Yersinia pestis*. PLoS ONE. 2012;7:e34714.
- 918 27. Yang H, Wang T, Tian G, Zhang Q, Wu X, Xin Y, et al. Host transcriptomic responses to  
919 pneumonic plague reveal that *Yersinia pestis* inhibits both the initial adaptive and innate  
920 immune responses in mice. Int. J. Med. Microbiol. 2017;307:64–74.
- 921 28. Comer JE, Sturdevant DE, Carmody AB, Virtaneva K, Gardner D, Long D, et al.  
922 Transcriptomic and innate immune responses to *Yersinia pestis* in the lymph node during  
923 bubonic plague. Infection and Immunity. American Society for Microbiology Journals;  
924 2010;78:5086–98.
- 925 29. Begon M, Klassovskiy N, Ageyev V, Suleimenov B, Atshabar B, Bennett M. Epizootiologic  
926 Parameters for Plague in Kazakhstan. Emerging Infect. Dis. Centers for Disease Control and  
927 Prevention; 2006;12:268–73.
- 928 30. Zhang Y, Dai X, Wang X, Maituohuti A, Cui Y, Rehemu A, et al. Dynamics of *Yersinia pestis*  
929 and its antibody response in great gerbils (*Rhombomys opimus*) by subcutaneous infection.  
930 PLoS ONE. 2012;7:e46820.
- 931 31. Casanova J-L, Abel L. The genetic theory of infectious diseases: a brief history and  
932 selected illustrations. Annu Rev Genomics Hum Genet. Annual Reviews; 2013;14:215–43.
- 933 32. Tollenaere C, Rahalison L, Ranjalahy M, Rahelinirina S, Duplantier JM, Brouat C. CCR5  
934 polymorphism and plague resistance in natural populations of the black rat in Madagascar.  
935 Infection, Genetics and Evolution. Elsevier; 2008;8:891–7.

- 936 33. Blanchet C, Jaubert J, Carniel E, Fayolle C, Milon G, Szatanik M, et al. Mus spretus  
937 SEG&sol;Pas mice resist virulent Yersinia pestis, under multigenic control. Genes and  
938 Immunity. Nature Publishing Group; 2010;12:23–30.
- 939 34. Busch JD, Van Andel R, Cordova J, Colman RE, Keim P, Rocke TE, et al. Population  
940 differences in host immune factors may influence survival of Gunnison's prairie dogs  
941 (Cynomys gunnisoni) during plague outbreaks. Journal of Wildlife Diseases. 2011;47:968–73.
- 942 35. Demeure CE, Blanchet C, Fitting C, Fayolle C, Khun H, Szatanik M, et al. Early Systemic  
943 Bacterial Dissemination and a Rapid Innate Immune Response Characterize Genetic  
944 Resistance to Plague of SEG Mice. Journal of Infectious Diseases. 2011;205:134–43.
- 945 36. Vladimer GI, Weng D, Paquette SWM, Vanaja SK, Rathinam VAK, Aune MH, et al. The  
946 NLRP12 inflammasome recognizes Yersinia pestis. Immunity. 2012;37:96–107.
- 947 37. Tollenaere C, Jacquet S, Ivanova S, Loiseau A, Duplantier JM, Streiff R, et al. Beyond an  
948 AFLP genome scan towards the identification of immune genes involved in plague resistance  
949 in Rattus rattus from Madagascar. Mol Ecol. Wiley/Blackwell (10.1111); 2012;22:354–67.
- 950 38. Busch JD, Van Andel R, Stone NE, Cobble KR, Nottingham R, Lee J, et al. The innate  
951 immune response may be important for surviving plague in wild gunnison's prairie dogs.  
952 Journal of Wildlife Diseases. 2013;49:920–31.
- 953 39. Tollenaere C, Ivanova S, Duplantier J-M, Loiseau A, Rahalison L, Rahelinirina S, et al.  
954 Contrasted Patterns of Selection on MHC-Linked Microsatellites in Natural Populations of  
955 the Malagasy Plague Reservoir. Salamin N, editor. PLoS ONE. Public Library of Science;  
956 2012;7:e32814.

- 957 40. Cobble KR, Califf KJ, Stone NE, Shuey MM, Birdsell DN, Colman RE, et al. Genetic variation  
958 at the MHC DRB1 locus is similar across Gunnison's prairie dog (*Cynomys gunnisoni*) colonies  
959 regardless of plague history. *Ecol Evol.* 2016;6:2624–51.
- 960 41. Bean AGD, Baker ML, Stewart CR, Cowled C, Deffrasnes C, Wang L-F, et al. Studying  
961 immunity to zoonotic diseases in the natural host - keeping it real. *Nat Rev Immunol.* Nature  
962 Publishing Group; 2013;13:851–61.
- 963 42. Monzón-Casanova E, Rudolf R, Starick L, Müller I, Söllner C, Müller N, et al. The Forgotten:  
964 Identification and Functional Characterization of MHC Class II Molecules H2-Eb2 and RT1-  
965 Db2. *J. Immunol. American Association of Immunologists*; 2016;196:988–99.
- 966 43. Ballingall KT, Bontrop RE, Ellis SA, Grimholt U, Hammond JA, Ho C-S, et al. Comparative  
967 MHC nomenclature: report from the ISAG/IUIS-VIC committee 2018. *Immunogenetics.*  
968 Springer Berlin Heidelberg; 2018;46:333–8.
- 969 44. Braunstein NS, Germain RN. The mouse E beta 2 gene: a class II MHC beta gene with  
970 limited intraspecies polymorphism and an unusual pattern of transcription. *EMBO J.*  
971 European Molecular Biology Organization; 1986;5:2469–76.
- 972 45. Kumar S, Stecher G, Tamura K. MEGA7: Molecular Evolutionary Genetics Analysis Version  
973 7.0 for Bigger Datasets. *Mol. Biol. Evol.* 2016;33:1870–4.
- 974 46. Waterhouse AM, Procter JB, Martin DMA, Clamp M, Barton GJ. Jalview Version 2--a  
975 multiple sequence alignment editor and analysis workbench. *Bioinformatics.* 2009;25:1189–  
976 91.



- 977 47. Jensen KK, Andreatta M, Marcatili P, Buus S, Greenbaum JA, Yan Z, et al. Improved  
978 methods for predicting peptide binding affinity to MHC class II molecules. *Immunology*.  
979 Wiley/Blackwell (10.1111); 2018;54:159.
- 980 48. Hargreaves AD, Zhou L, Christensen J, Marletaz F, Liu S, Li F, et al. Genome sequence of a  
981 diabetes-prone desert rodent reveals a mutation hotspot around the ParaHox gene cluster.  
982 2016;:1–10.
- 983 49. Kawai T, Akira S. The role of pattern-recognition receptors in innate immunity: update on  
984 Toll-like receptors. *Nat. Immunol.* Nature Publishing Group; 2010;11:373–84.
- 985 50. Salazar Gonzalez RM, Shehata H, O'Connell MJ, Yang Y, Moreno-Fernandez ME,  
986 Chougnet CA, et al. *Toxoplasma gondii*-derived profilin triggers human toll-like receptor 5-  
987 dependent cytokine production. *JIN.* Karger Publishers; 2014;6:685–94.
- 988 51. Roach JC, Glusman G, Rowen L, Kaur A, Purcell MK, Smith KD, et al. The evolution of  
989 vertebrate Toll-like receptors. *Proceedings of the National Academy of Sciences*.  
990 2005;102:9577–82.
- 991 52. Temperley ND, Berlin S, Paton IR, Griffin DK, Burt DW. Evolution of the chicken Toll-like  
992 receptor gene family: A story of gene gain and gene loss. *BMC Genomics* 2015 16:1. *BioMed*  
993 *Central*; 2008;9:62.
- 994 53. Solbakken MH, Tørresen OK, Nederbragt AJ, Seppola M, Gregers TF, Jakobsen KS, et al.  
995 Evolutionary redesign of the Atlantic cod (*Gadus morhua* L.) Toll-like receptor repertoire by  
996 gene losses and expansions. *Sci Rep.* Nature Publishing Group; 2016;6:39.

- 997 54. Barreiro LB, Ben-Ali M, Quach H, Laval G, Patin E, Pickrell JK, et al. Evolutionary Dynamics  
998 of Human Toll-Like Receptors and Their Different Contributions to Host Defense. McVean G,  
999 editor. PLOS Genetics. Public Library of Science; 2009;5:e1000562.
- 1000 55. Babik W, Dudek K, Fijarczyk A, Pabijan M, Stuglik M, Szkotak R, et al. Constraint and  
1001 Adaptation in newt Toll-Like Receptor Genes. Genome Biology and Evolution. 2014;7:81–95.
- 1002 56. Mathur R, Oh H, Zhang D, Park S-G, Seo J, Koblansky A, et al. A Mouse Model of  
1003 Salmonella Typhi Infection. Cell. Cell Press; 2012;151:590–602.
- 1004 57. Oldenburg M, Krüger A, Ferstl R, Kaufmann A, Nees G, Sigmund A, et al. TLR13  
1005 Recognizes Bacterial 23S rRNA Devoid of Erythromycin Resistance–Forming Modification.  
1006 Science. American Association for the Advancement of Science; 2012;337:1111–5.
- 1007 58. Chevret P, Dobigny G. Systematics and evolution of the subfamily Gerbillinae (Mammalia,  
1008 Rodentia, Muridae). Molecular Phylogenetics and Evolution. Academic Press; 2005;35:674–  
1009 88.
- 1010 59. Dhariwala MO, Olson RM, Anderson DM. Induction of Type I Interferon through a  
1011 Noncanonical Toll-Like Receptor 7 Pathway during Yersinia pestis Infection. Bäumlér AJ,  
1012 editor. Infection and Immunity. 2017;85.
- 1013 60. Amemiya K, Meyers JL, Rogers TE, Fast RL, Bassett AD, Worsham PL, et al. CpG  
1014 oligodeoxynucleotides augment the murine immune response to the Yersinia pestis F1-V  
1015 vaccine in bubonic and pneumonic models of plague. Vaccine. 2009;27:2220–9.

- 1016 61. Saikh KU, Kissner TL, Sultana A, Ruthel G, Ulrich RG. Human monocytes infected with  
1017 *Yersinia pestis* express cell surface TLR9 and differentiate into dendritic cells. *J. Immunol.*  
1018 2004;173:7426–34.
- 1019 62. Celhar T, Pereira-Lopes S, Thornhill SI, Lee HY, Dhillon MK, Poidinger M, et al. TLR7 and  
1020 TLR9 ligands regulate antigen presentation by macrophages. *Int. Immunol.* 2016;28:223–32.
- 1021 63. Raetz CRH, Reynolds CM, Trent MS, Bishop RE. Lipid A modification systems in gram-  
1022 negative bacteria. *Annu. Rev. Biochem. Annual Reviews*; 2007;76:295–329.
- 1023 64. Rebeil R, Ernst RK, Gowen BB, Miller SI, Hinnebusch BJ. Variation in lipid A structure in  
1024 the pathogenic yersiniae. *Mol. Microbiol. Wiley/Blackwell* (10.1111); 2004;52:1363–73.
- 1025 65. Steimle A, Autenrieth IB, Frick J-S. Structure and function: Lipid A modifications in  
1026 commensals and pathogens. *Int. J. Med. Microbiol.* 2016;306:290–301.
- 1027 66. Foster SL, Medzhitov R. Gene-specific control of the TLR-induced inflammatory response.  
1028 *Clin. Immunol.* 2009;130:7–15.
- 1029 67. Nei M, Gu X, Sitnikova T. Evolution by the birth-and-death process in multigene families  
1030 of the vertebrate immune system. *Proceedings of the National Academy of Sciences.*  
1031 *National Academy of Sciences*; 1997;94:7799–806.
- 1032 68. Amadou C, Younger RM, Sims S, Matthews LH, Rogers J, Kumanovics A, et al. Co-  
1033 duplication of olfactory receptor and MHC class I genes in the mouse major  
1034 histocompatibility complex. *Hum. Mol. Genet.* 2003;12:3025–40.

- 1035 69. Ohtsuka M, Inoko H, Kulski JK, Yoshimura S. Major histocompatibility complex (Mhc)  
1036 class Ib gene duplications, organization and expression patterns in mouse strain C57BL/6.  
1037 BMC Genomics 2015 16:1. BioMed Central; 2008;9:178.
- 1038 70. Hughes AL, Nei M. Evolutionary relationships of class II major-histocompatibility-complex  
1039 genes in mammals. Mol. Biol. Evol. 1990;7:491–514.
- 1040 71. Vijluma A, Mikko S, Hahn D, Skow L, Andersson G, Bergström TF. Genomic structure of  
1041 the horse major histocompatibility complex class II region resolved using PacBio long-read  
1042 sequencing technology. Sci Rep. Nature Publishing Group; 2017;7:45518.
- 1043 72. Katju V, Lynch M. The structure and early evolution of recently arisen gene duplicates in  
1044 the *Caenorhabditis elegans* genome. Genetics. Genetics Society of America; 2003;165:1793–  
1045 803.
- 1046 73. Gregers TF, Fleckenstein B, Vartdal F, Roepstorff P, Bakke O, Sandlie I. MHC class II  
1047 loading of high or low affinity peptides directed by li/peptide fusion constructs: implications  
1048 for T cell activation. Int. Immunol. 2003;15:1291–9.
- 1049 74. Liu X, Zhan Z, Li D, Xu L, Ma F, Zhang P, et al. Intracellular MHC class II molecules promote  
1050 TLR-triggered innate immune responses by maintaining activation of the kinase Btk. Nat.  
1051 Immunol. Nature Publishing Group; 2011;12:416–24.
- 1052 75. Matzaraki V, Kumar V, Wijmenga C, Zhernakova A. The MHC locus and genetic  
1053 susceptibility to autoimmune and infectious diseases. Genome Biology. BioMed Central;  
1054 2017;18:76.

- 1055 76. Zhang Y, Dai X, Wang Q, Chen H, Meng W, Wu K, et al. Transmission efficiency of the  
1056 plague pathogen (*Y. pestis*) by the flea, *Xenopsylla skrjabini*, to mice and great gerbils.  
1057 *Parasit Vectors*. BioMed Central; 2015;8:256.
- 1058 77. Martin M. Cutadapt removes adapter sequences from high-throughput sequencing reads.  
1059 *EMBnet.journal*. 2011;17:pp.10–2.
- 1060 78. Gnerre S, Maccallum I, Przybylski D, Ribeiro FJ, Burton JN, Walker BJ, et al. High-quality  
1061 draft assemblies of mammalian genomes from massively parallel sequence data. *Proc. Natl.*  
1062 *Acad. Sci. U.S.A. National Acad Sciences*; 2011;108:1513–8.
- 1063 79. Elgvin TO, Trier CN, Tørresen OK, Hagen IJ, Lien S, Nederbragt AJ, et al. The genomic  
1064 mosaicism of hybrid speciation. *Sci Adv*. 2017;3:e1602996.
- 1065 80. Pujolar JM, Dalén L, Olsen RA, Hansen MM, Madsen J. First de novo whole genome  
1066 sequencing and assembly of the pink-footed goose. *Genomics*. 2018;110:75–9.
- 1067 81. Parra G, Bradnam K, Korf I. CEGMA: a pipeline to accurately annotate core genes in  
1068 eukaryotic genomes. *Bioinformatics*. 2007;23:1061–7.
- 1069 82. Parra G, Bradnam K, Ning Z, Keane T, Korf I. Assessing the gene space in draft genomes.  
1070 *Nucleic Acids Res*. 2009;37:289–97.
- 1071 83. Simão FA, Waterhouse RM, Ioannidis P, Kriventseva EV, Zdobnov EM. BUSCO: assessing  
1072 genome assembly and annotation completeness with single-copy orthologs. *Bioinformatics*.  
1073 Oxford University Press; 2015;31:3210–2.

- 1074 84. Kumar S, Jones M, Koutsovoulos G, Clarke M, Blaxter M. Blobology: exploring raw  
1075 genome data for contaminants, symbionts and parasites using taxon-annotated GC-coverage  
1076 plots. *Front Genet. Frontiers*; 2013;4:237.
- 1077 85. Holt C, Yandell M. MAKER2: an annotation pipeline and genome-database management  
1078 tool for second-generation genome projects. *BMC Bioinformatics*. 2011.
- 1079 86. Varadharajan S, Sandve SR, Gillard GB, Tørresen OK, Mulugeta TD, Hvidsten TR, et al. The  
1080 grayling genome reveals selection on gene expression regulation after whole genome  
1081 duplication. *Genome Biology and Evolution*. 2018.
- 1082 87. Lomsadze A, Ter-Hovhannisyan V, Chernoff YO, Borodovsky M. Gene identification in  
1083 novel eukaryotic genomes by self-training algorithm. *Nucleic Acids Res*. 2005;33:6494–506.
- 1084 88. Tørresen OK, Briec MSO, Solbakken MH, Sørhus E, Nederbragt AJ, Jakobsen KS, et al.  
1085 Genomic architecture of haddock (*Melanogrammus aeglefinus*) shows expansions of innate  
1086 immune genes and short tandem repeats. *BMC Genomics* 2015 16:1. *BioMed Central*;  
1087 2018;19:240.
- 1088 89. Hurt P, Walter L, Sudbrak R, Klages S, Müller I, Shiina T, et al. The genomic sequence and  
1089 comparative analysis of the rat major histocompatibility complex. *Genome Res. Cold Spring*  
1090 *Harbor Lab*; 2004;14:631–9.
- 1091 90. Katoh K, Standley DM. MAFFT multiple sequence alignment software version 7:  
1092 improvements in performance and usability. *Mol. Biol. Evol*. 2013;30:772–80.
- 1093 91. Maddison WP, Maddison DR. Mesquite: a modular system for evolutionary analysis.  
1094 Version 3.4.

- 1095 92. Talavera G, Castresana J, Kjer K, Page R, Sullivan J. Improvement of Phylogenies after  
1096 Removing Divergent and Ambiguously Aligned Blocks from Protein Sequence Alignments.  
1097 Kjer K, Page R, Sullivan J, editors. *Systematic Biology*. Oxford University Press; 2007;56:564–  
1098 77.
- 1099 93. Stamatakis A. RAXML-VI-HPC: maximum likelihood-based phylogenetic analyses with  
1100 thousands of taxa and mixed models. *Bioinformatics*. Oxford University Press;  
1101 2006;22:2688–90.
- 1102 94. Aberer AJ, Krompass D, Stamatakis A. Pruning rogue taxa improves phylogenetic  
1103 accuracy: an efficient algorithm and webservice. *Systematic Biology*. 2013;62:162–6.
- 1104 95. Huelsenbeck JP, Ronquist F. MRBAYES: Bayesian inference of phylogenetic trees.  
1105 *Bioinformatics*. 2001;17:754–5.
- 1106 96. Delpont W, Poon AFY, Frost SDW, Kosakovsky Pond SL. Datamonkey 2010: a suite of  
1107 phylogenetic analysis tools for evolutionary biology. *Bioinformatics*. Oxford University Press;  
1108 2010;26:2455–7.
- 1109 97. Weaver S, Shank SD, Spielman SJ, Li M, Muse SV, Kosakovsky Pond SL. Datamonkey 2.0: a  
1110 modern web application for characterizing selective and other evolutionary processes. *Mol.*  
1111 *Biol. Evol.* 2018;83:8916.
- 1112 98. Kosakovsky Pond SL, Murrell B, Fourment M, Frost SDW, Delpont W, Scheffler K. A  
1113 Random Effects Branch-Site Model for Detecting Episodic Diversifying Selection. *Mol. Biol.*  
1114 *Evol.* 2011;28:3033–43.

- 1115 99. Murrell B, Wertheim JO, Moola S, Weighill T, Scheffler K, Kosakovsky Pond SL. Detecting  
1116 individual sites subject to episodic diversifying selection. Malik HS, editor. PLOS Genetics.  
1117 2012;8:e1002764.
- 1118 100. Smith MD, Wertheim JO, Weaver S, Murrell B, Scheffler K, Kosakovsky Pond SL. Less is  
1119 more: an adaptive branch-site random effects model for efficient detection of episodic  
1120 diversifying selection. Mol. Biol. Evol. 2015;32:1342–53.
- 1121 101. Kelley LA, Mezulis S, Yates CM, Wass MN, Sternberg MJE. The Phyre2 web portal for  
1122 protein modeling, prediction and analysis. Nat Protoc. Nature Publishing Group;  
1123 2015;10:845–58.
- 1124 102. Péléraux A, Karlsson L, Chambers J, Peterson PA. Genomic organization of a mouse  
1125 MHC class II region including the H2-M and Lmp2 loci. Immunogenetics. 1996;43:204–14.
- 1126 103. Chomczynski P, Sacchi N. The single-step method of RNA isolation by acid guanidinium  
1127 thiocyanate-phenol-chloroform extraction: twenty-something years on. Nat Protoc. Nature  
1128 Publishing Group; 2006;1:581–5.
